# Supplementary material for: Direct C-3 alkylation of coumarins via decarboxylative coupling with carboxylic acids
Source: Royal Society of Chemistry journal article supplement (doi:10.1039/c8nj06410e), 2019-01-01

Supporting Information  
New Journal of Chemistry

**Direct C-3 Alkylation of Coumarins *via* Decarboxylative Coupling with Carboxylic Acids**

Farnaz Jafarpour,\* Masoumeh Darvishmolla, Narges Azaddoost and Farid Mohaghegh  
School of Chemistry, College of Science, University of Tehran, P.O. Box 14155-6455,  
Tehran, Iran

*jafarpur@khayam.ut.ac.ir*

**Table of Contents**

|                                                                   |           |
|-------------------------------------------------------------------|-----------|
| <b>General remarks</b>                                            | <b>S2</b> |
| <b>Typical Experimental Procedure for alkylation of coumarins</b> | <b>S2</b> |
| <b>Copies of <sup>1</sup>H and <sup>13</sup>C NMR Spectra</b>     | <b>S8</b> |

**General remarks:** The following includes general experimental procedures, specific details for representative reactions, isolation and spectroscopic information for the compounds. All reagents were commercially available and used as received. Coumarins coumarin-3-carboxylic acid derivatives were synthesized following the procedures described in the literature.<sup>1</sup> The reactions were carried out in an oil bath using Microwave Vials (2-5 ml). Column chromatography was carried out on silica gel (230–400 mesh). TLC was conducted on silica gel 250 micron, F254 plates. <sup>1</sup>H NMR spectra were recorded at room temperature on Bruker and Varian 300, 400 and 500 MHz spectrometers, using CDCl<sub>3</sub> as solvent. Chemical shifts are reported in ppm with TMS as an internal standard (TMS: δ 0.0 ppm). <sup>13</sup>C NMR spectra are referenced from the solvent central peak (77.23 ppm). Chemical shifts are given in ppm. Mass spectra were recorded on Agilent 5975C Mass Spectrometer.

**Typical Experimental Procedure for alkylation of coumarins.** A vial equipped with a stir bar was charged with coumarin (0.2 mmol, 1equiv), carboxylic acid (0.4 mmol, 2 equiv), K<sub>2</sub>S<sub>2</sub>O<sub>8</sub> (0.4 mmol, 2 equiv), K<sub>2</sub>CO<sub>3</sub> (0.4 mmol, 2 equiv), ACN/H<sub>2</sub>O (0.1/0.5 mL). Then the vial was capped and the resulting mixture was heated in an oil bath at 120 °C for 2 h. Upon completion of the reaction, the resulting mixture was extracted with ethyl acetate. The combined organic layers was dried over anhydrous Na<sub>2</sub>SO<sub>4</sub>. After the removal of the solvent under reduced pressure, the crude product was purified by column chromatography on silica gel (EtOAc/hexane gradient, 5%) to provide the desired products.

**3-Tert-butyl-2H-chromen-2-one (3a).** Colorless solid (30 mg, 74%), mp 71-72 °C (Ref.<sup>2</sup> 82-83 °C); <sup>1</sup>H NMR (400 MHz, CDCl<sub>3</sub>): δ 7.54 (s, 1H), 7.46-7.42 (m, 2H), 7.29-7.27 (m, 1H), 7.25-7.21 (m, 1H), 1.39 (s, 9H); <sup>13</sup>C NMR (100 MHz, CDCl<sub>3</sub>): δ 159.9, 153.2, 137.1, 136.5, 130.5, 127.5, 123.9, 119.4, 116.0, 35.0, 28.6; IR: 2926, 1712, 1611, 1476, 1273, 962, 776 cm<sup>-1</sup>; MS analysis m/z 202 (M<sup>+</sup>, 34%), 187 (63), 160 (45), 147 (45), 83 (45), 57 (100); Anal. Calcd for C<sub>13</sub>H<sub>14</sub>O<sub>2</sub>: C, 77.20; H, 6.98. Found: C, 77.56; H, 7.12.

**3-Isopropyl-2H-chromen-2-one (3b).** Colorless solid (23 mg, 62%), mp 60-61 °C (Ref.<sup>3</sup>, 47-48 °C); <sup>1</sup>H NMR (500 MHz, CDCl<sub>3</sub>): δ 7.49 (s, 1H), 7.47-7.45 (m, 2H), 7.32 (m, 1H), 7.27 (m, 1H), 3.13 (t, J = 7.0 Hz, 1H), 1.28 (d, J = 7.0 Hz, 6H); <sup>13</sup>C NMR (125 MHz, CDCl<sub>3</sub>): δ 161.4, 152.8, 135.9, 135.6, 130.4, 127.3, 124.1, 119.5, 116.3, 28.7, 21.4; Anal. Calcd for C<sub>12</sub>H<sub>12</sub>O<sub>2</sub>: C, 76.57; H, 6.43. Found: C, 76.89; H, 6.54.

---

<sup>1</sup> (a) Sánchez-Recillas, A.; Navarrete-Vázquez, G.; Hidalgo-Figueroa, S.; Rios, M. Y.; Ibarra-Barajas, M.; Estrada-Soto, S. *Eur. J. Med. Chem.*, **2014**, *77*, 400; (b) Plisson, F.; Huang, X.-C.; Zhang, H.; Khalil, Z.; Capon, R. J. *Chem. An Asian J.*, **2012**, *7*, 1616.

<sup>2</sup> Russell, G. A.; Shi, B. Z.; Jiang, W.; Hu, S.; Kim, B. H.; Baik, W. Electron transfer processes. 57. *J. Am. Chem. Soc.*, **1995**, *117*, 3952.

<sup>3</sup> Yuan, J.-W.; Yang, L.-R.; Yin, Q.-Y.; Mao, P.; Qu, L.-B. *RSC Adv.*, **2016**, *6*, 35936.

**3-(Heptan-3-yl)-2H-chromen-2-one (3c).** Colorless oil (28 mg, 57%); <sup>1</sup>H NMR (500 MHz, CDCl<sub>3</sub>): δ 7.47-7.44 (m, 2H), 7.43 (s, 1H), 7.31 (d, *J* = 8.5 Hz, 1H), 7.25 (t, *J* = 7.5 Hz, 1H), 2.81 (qui, *J* = 7.1 Hz, 1H), 1.71-1.62 (m, 4H), 1.34-1.19 (m, 4H), 0.87 (t, *J* = 7.5 Hz, 3H), 0.86 (t, *J* = 7.1 Hz, 3H); <sup>13</sup>C NMR (125 MHz, CDCl<sub>3</sub>): δ 161.5, 152.9, 137.8, 132.9, 130.4, 127.2, 124.1, 119.5, 116.2, 41.6, 33.2, 29.5, 26.7, 22.7, 13.9, 11.6. IR: 2929, 2864, 1710, 1610, 1455, 1225, 1173, 755 cm<sup>-1</sup>; MS analysis *m/z* 244 (M<sup>+</sup>, 57%), 215 (36), 188 (78), 159 (100), 115 (39); Anal. Calcd for C<sub>16</sub>H<sub>20</sub>O<sub>2</sub>: C, 78.65; H, 8.25. Found: C, 78.29; H, 8.10.

**3-Cyclopropyl-2H-chromen-2-one (3d).** Yellow solid (25 mg, 67%), mp 70-72 °C (Ref.<sup>4</sup> 83-84 °C); <sup>1</sup>H NMR (500 MHz, CDCl<sub>3</sub>): δ 7.45-7.40 (m, 1H), 7.39 (d, *J* = 7.8 Hz, 1H), 7.27 (d, *J* = 8.1 Hz, 1H), 7.25-7.19 (m, 2H), 2.08-2.01 (m, 1H), 1.05-0.97 (m, 2H), 0.77-0.74 (m, 2H); <sup>13</sup>C NMR (125 MHz, CDCl<sub>3</sub>): δ 161.9, 152.5, 134.4, 131.4, 130.3, 127.0, 124.3, 119.4, 116.3, 11.3, 7.7; IR: 3012, 1691, 1602, 1453, 1402, 1175, 1018, 746 cm<sup>-1</sup>; MS analysis *m/z* 186 (M<sup>+</sup>, 100%), 171 (50), 157 (55), 131 (50), 115 (33). Anal; Calcd for C<sub>12</sub>H<sub>10</sub>O<sub>2</sub>: C, 77.40; H, 5.41. Found: C, 77.69; H, 5.53.

**3-Cyclobutyl-2H-chromen-2-one (3e).** Yellow solid (20 mg, 51%), mp 72-74 °C; <sup>1</sup>H NMR (500 MHz, CDCl<sub>3</sub>): δ 7.48 (s, 1H), 7.47-7.45 (m, 2H), 7.32 (d, *J* = 8.5 Hz, 1H), 7.28 (m, 1H), 3.60 (q, *J* = 8.7 Hz, 1H), 2.43-2.38 (m, 2H), 2.15-2.05 (m, 3H), 1.90-1.84 (m, 1H); <sup>13</sup>C NMR (125 MHz, CDCl<sub>3</sub>): δ 161.1, 152.8, 136.1, 132.9, 130.4, 127.2, 124.2, 119.5, 116.3, 36.0, 27.7, 18.2; IR: 2954, 2861, 1706, 1602, 1451, 1251, 1182, 1083, 969, 745 cm<sup>-1</sup>; MS analysis *m/z* 200 (M<sup>+</sup>, 17%), 172 (100), 144 (37), 115 (33); Anal. Calcd for C<sub>13</sub>H<sub>12</sub>O<sub>2</sub>: C, 77.98; H, 6.04. Found: C, 78.22; H, 6.14.

**3-Cyclopentyl-2H-chromen-2-one (3f).**<sup>5</sup> Colorless solid (29 mg, 67%), mp 68-69°C; <sup>1</sup>H NMR (500 MHz, CDCl<sub>3</sub>): δ 7.50 (s, 1H), 7.48-7.44 (m, 2H), 7.32 (d, *J* = 8.1 Hz, 1H), 7.27-7.24 (m, 1H), 3.16 (qui, *J* = 8.5 Hz, 1H), 2.14-2.08 (m, 2H), 1.85-1.70 (m, 4H), 1.63-1.56 (m, 2H); <sup>13</sup>C NMR (125 MHz, CDCl<sub>3</sub>): δ 161.7, 152.8, 135.9, 133.4, 130.3, 127.2, 124.1, 119.5, 116.3, 40.7, 31.7, 25.0; IR: 2958, 2867, 1764, 1689, 1453, 1178, 1076, 818, 778 cm<sup>-1</sup>; MS analysis *m/z* 214 (M<sup>+</sup>, 100%), 171 (24), 157(50), 128 (15), 115 (33); Anal. Calcd for C<sub>14</sub>H<sub>14</sub>O<sub>2</sub>: C, 78.48; H, 6.59. Found: C, 78.73; H, 6.72.

**3-Cyclohexyl-2H-chromen-2-one (3g).** Colorless solid (30 mg, 65%), mp 86-87 °C (Ref.<sup>4</sup> 90-92 °C); <sup>1</sup>H NMR (500 MHz, CDCl<sub>3</sub>): δ 7.47-7.44 (m, 3H), 7.30 (d, *J* = 8.5 Hz, 1H), 7.27-7.24 (m, 1H), 2.78 (tt, *J* = 11.8, 3.3 Hz, 1H), 2.00-1.97 (m, 2H), 1.87-1.85 (m, 2H), 1.79-1.77 (m, 1H), 1.50-1.41 (m, 2H), 1.35-1.24 (m, 3H); <sup>13</sup>C NMR (125 MHz, CDCl<sub>3</sub>): δ 161.5, 152.7, 136.3, 134.8, 130.4, 127.3, 124.1, 119.6, 116.2, 38.2, 32.1, 26.5, 26.1; Anal. Calcd for C<sub>15</sub>H<sub>16</sub>O<sub>2</sub>: C, 78.92; H, 7.06. Found: C, 78.63; H, 6.95.

<sup>4</sup> Hou, J.; Ee, A.; Feng, W.; Xu, J.-H.; Zhao, Y.; Wu, J. *J. Am. Chem. Soc.*, **2018**, *140*, 5257.

<sup>5</sup> Banerjee, A.; Santra, S. K.; Khatun, N.; Ali, W.; Patel, B. K. *Chem. Commun.*, **2015**, *51*, 15422.

**3-Propyl-2H-chromen-2-one (3h).** Colorless oil (22 mg, 59%); <sup>1</sup>H NMR (500 MHz, CDCl<sub>3</sub>): δ 7.47 (s, 1H), 7.46-7.42 (m, 2H), 7.29 (d, *J* = 8.3 Hz, 1H), 7.25-7.22 (m, 1H), 2.54 (t, *J* = 7.5 Hz, 2H), 1.71-1.64 (m, 2H), 0.99 (t, *J* = 7.3 Hz, 3H); <sup>13</sup>C NMR (125 MHz, CDCl<sub>3</sub>): δ 161.7, 153.1, 138.4, 130.4, 129.8, 127.0, 124.1, 119.5, 116.3, 32.8, 21.2, 13.7; IR: 3054, 2960, 1716, 1609, 1455, 1176, 1054, 753 cm<sup>-1</sup>; MS analysis *m/z* 189 (M<sup>+</sup>, 100%), 173 (15), 159 (15), 147 (30); Anal. Calcd for C<sub>12</sub>H<sub>12</sub>O<sub>2</sub>: C, 76.57; H, 6.43. Found: C, 76.92; H, 6.55.

**3-Methyl-2H-chromen-2-one (3i).** Colorless solid (15 mg, 47%), mp 90-91 °C (Ref.<sup>4</sup> 86-87 °C); <sup>1</sup>H NMR (400 MHz, CDCl<sub>3</sub>): δ 7.44 (s, 1H), 7.40-7.32 (m, 2H), 7.23 (d, *J* = 8.2 Hz, 1H), 7.19-7.15 (m, 1H), 2.14 (d, *J* = 1.4 Hz 3H); <sup>13</sup>C NMR (100 MHz, CDCl<sub>3</sub>): δ 162.3, 153.3, 139.3, 130.5, 127.0, 125.9, 124.3, 119.6, 116.5, 17.2; Anal. Calcd for C<sub>10</sub>H<sub>8</sub>O<sub>2</sub>: C, 74.99; H, 5.03. Found: C, 74.75; H, 4.03.

**3-Tert-butyl-7-methoxy-2H-chromen-2-one (3k).** Colorless solid (38 mg, 82%), mp 82-83 °C; <sup>1</sup>H NMR (300 MHz, CDCl<sub>3</sub>): δ 7.48 (s, 1H), 7.33 (d, *J* = 8.4 Hz, 1H), 6.81-6.75 (m, 2H), 3.84 (s, 3H), 1.36 (s, 9H); <sup>13</sup>C NMR (75 MHz, CDCl<sub>3</sub>): δ 161.8, 160.2, 154.7, 136.7, 133.3, 128.5, 113.0, 112.1, 99.9, 55.6, 34.7, 28.6; IR: 2958, 1711, 1611, 1576, 1476, 1275, 1099, 962, 776 cm<sup>-1</sup>; MS analysis *m/z* 232 (M<sup>+</sup>, 81%), 217 (100), 189 (93), 174 (15), 149 (15), 129 (12); Anal. Calcd for C<sub>14</sub>H<sub>16</sub>O<sub>3</sub>: C, 72.39; H, 6.94. Found: C, 72.60; H, 7.05.

**3-Tert-butyl-6-bromo-2H-chromen-2-one (3l).** Colorless solid (34 mg, 60%), mp 128-130 °C; <sup>1</sup>H NMR (500 MHz, CDCl<sub>3</sub>): δ 7.61 (d, *J* = 2.5 Hz, 1H), 7.54 (dd, *J* = 8.5, 2.5 Hz, 1H), 7.47 (s, 1H), 7.18 (d, *J* = 8.5 Hz, 1H), 1.40 (s, 9H); <sup>13</sup>C NMR (125 MHz, CDCl<sub>3</sub>): δ 159.1, 152.0, 138.4, 135.3, 133.2, 129.9, 121.0, 117.7, 116.4, 35.2, 28.5; IR: 2956, 1712, 1602, 1562, 1478, 1360, 1250, 1214, 1139, 979, 812 cm<sup>-1</sup>; MS analysis *m/z* 280 (M<sup>+</sup>, 70%), 265 (100), 238 (94), 158 (41), 128 (23), 115 (29); Anal. Calcd for C<sub>13</sub>H<sub>13</sub>BrO<sub>2</sub>: C, 55.54; H, 4.66. Found: C, 55.80; H, 4.80.

**6-Bromo-3-cyclohexyl-2H-chromen-2-one (3m).** Colorless solid (33 mg, 54%), mp 125-128 °C; <sup>1</sup>H NMR (500 MHz, CDCl<sub>3</sub>): δ 7.60 (d, *J* = 2.0 Hz, 1H), 7.55 (dd, *J* = 8.5, 2.0 Hz, 1H), 7.37 (s, 1H), 7.20 (d, *J* = 8.5 Hz, 1H), 2.79 (m, 1H), 2.04-1.92 (m, 2H), 1.93-1.80 (m, 2H), 1.79 (m, 1H), 1.53-1.37 (m, 2H), 1.35-1.17 (m, 3H); <sup>13</sup>C NMR (125 MHz, CDCl<sub>3</sub>): δ 160.8, 151.5, 136.2, 134.9, 133.1, 129.6, 121.2, 118.0, 116.6, 38.3, 32.0, 26.4, 26.1; IR: 2918, 2853, 1707, 1475, 1242, 1065, 812 cm<sup>-1</sup>; MS analysis *m/z* 306 (M<sup>+</sup>, 100%), 250 (90), 238 (72), 224 (31), 128 (32), 115 (72); Anal. Calcd for C<sub>15</sub>H<sub>15</sub>BrO<sub>2</sub>: C, 58.65; H, 4.92. Found: C, 58.99; H, 5.07.

**3-Tert-butyl-8-methoxy-2H-chromen-2-one (3n).** Colorless solid (35 mg, 75%), mp 80-81 °C; <sup>1</sup>H NMR (400 MHz, CDCl<sub>3</sub>): δ 7.51 (s, 1H), 7.18-7.14 (m, 1H), 7.03-6.98 (m, 2H), 3.95 (s, 3H), 1.38 (s, 9H); <sup>13</sup>C NMR (100 MHz, CDCl<sub>3</sub>): δ 159.3, 146.9, 143.0,

137.5, 136.7, 122.7, 123.9, 120.2, 119.2, 112.5, 56.3, 35.2, 28.7; IR: 2956, 1711, 1611, 1576, 1473, 1273, 1099, 962, 776  $\text{cm}^{-1}$ ; MS analysis  $m/z$  232 ( $M^+$ , 90%), 217 (100), 190 (72), 174 (31), 161 (9), 146 (9); Anal. Calcd for  $\text{C}_{14}\text{H}_{16}\text{O}_3$ : C, 72.39; H, 6.94. Found: C, 72.10; H, 6.83.

**3-(Heptan-3-yl)-8-methoxy-2H-chromen-2-one (3o).** Yellow oil (39 mg, 72%);  $^1\text{H}$  NMR (500 MHz,  $\text{CDCl}_3$ ):  $\delta$  7.40 (s, 1H), 7.19 (m, 1H), 7.04 (m, 2H), 3.97 (s, 3H), 2.82 (qui,  $J = 7.0$  Hz, 1H), 1.71-1.63 (m, 4H), 1.34-1.21 (m, 4H), 0.87 (t,  $J = 7.5$  Hz, 3H), 0.86 (t,  $J = 7.1$  Hz, 3H);  $^{13}\text{C}$  NMR (125 MHz,  $\text{CDCl}_3$ ):  $\delta$  160.9, 147.0, 142.6, 137.9, 133.2, 123.9, 120.1, 118.7, 112.4, 56.2, 41.6, 33.2, 29.4, 26.7, 22.7, 14.0, 11.6; IR: 2928, 2862, 1711, 1610, 1473, 1271, 1101, 773, 730  $\text{cm}^{-1}$ ; MS analysis  $m/z$  274 ( $M^+$ , 63%), 217 (78), 203 (42), 189 (100), 161 (23), 115 (15); Anal. Calcd for  $\text{C}_{17}\text{H}_{22}\text{O}_3$ : C, 74.42; H, 8.08. Found: C, 74.72; H, 8.20.

**3-Isopropyl-7-methoxy-4-methyl-2H-chromen-2-one (3p).** Colorless solid (26 mg, 55%), mp 82-84  $^\circ\text{C}$ ;  $^1\text{H}$  NMR (500 MHz,  $\text{CDCl}_3$ ):  $\delta$  7.49 (d,  $J = 9.0$  Hz, 1H), 6.81 (dd,  $J = 9.0, 2.5$  Hz, 1H), 6.74 (d,  $J = 2.5$  Hz, 1H), 3.83 (s, 3H), 3.27 (t,  $J = 7.0$  Hz, 1H), 2.39 (s, 3H), 1.34 (d,  $J = 7.0$  Hz, 6H);  $^{13}\text{C}$  NMR (125 MHz,  $\text{CDCl}_3$ ):  $\delta$  161.5, 160.2, 153.8, 145.2, 127.9, 125.7, 114.3, 111.8, 100.3, 55.7, 28.6, 20.0, 14.7; IR: 2918, 2849, 1691, 1608, 1462, 1290, 1150, 1063, 929, 847  $\text{cm}^{-1}$ ; MS analysis  $m/z$  232 ( $M^+$ , 70%), 217 (100), 203 (32), 189 (29), 174 (8), 115 (8); Anal. Calcd for  $\text{C}_{14}\text{H}_{16}\text{O}_3$ : C, 72.39; H, 6.94. Found: C, 72.68; H, 7.07.

**3-Tert-butyl-6-nitro-2H-chromen-2-one (3q).** Colorless solid (10 mg, 20%), mp 112-115  $^\circ\text{C}$ ;  $^1\text{H}$  NMR (400 MHz,  $\text{CDCl}_3$ ):  $\delta$  8.41 (d,  $J = 2.6$  Hz, 1H), 8.32 (dd,  $J = 9.0, 2.6$  Hz, 1H), 7.61 (s, 1H), 7.40 (d,  $J = 9.0$  Hz, 1H), 1.41 (s, 9H);  $^{13}\text{C}$  NMR (100 MHz,  $\text{CDCl}_3$ ):  $\delta$  157.2, 155.7, 142.8, 138.6, 134.4, 124.4, 122.4, 118.4, 116.1, 34.4, 27.4; IR: 2937, 2851, 1698, 1608, 1542, 1361, 1150, 1063, 929, 847  $\text{cm}^{-1}$ ; MS analysis  $m/z$  247 ( $M^+$ , 54%), 232 (95), 205 (100), 186 (28), 158 (50), 115 (31); Anal. Calcd for  $\text{C}_{13}\text{H}_{13}\text{NO}_4$ : C, 63.15; H, 5.30; N, 5.67. Found: C, 63.48; H, 5.45; N, 5.89.

**3-Tert-butyl-7-methyl-2H-chromen-2-one (3r).** Colorless solid (32 mg, 75%), mp 70-73  $^\circ\text{C}$ ;  $^1\text{H}$  NMR (400 MHz,  $\text{CDCl}_3$ ):  $\delta$  7.49 (s, 1H), 7.32 (d,  $J = 7.8$  Hz, 1H), 7.07 (s, 1H), 7.03 (d,  $J = 7.8$  Hz, 1H), 2.41 (s, 3H), 1.37 (s, 9H);  $^{13}\text{C}$  NMR (100 MHz,  $\text{CDCl}_3$ ):  $\delta$  160.2, 153.4, 141.6, 136.7, 135.9, 127.3, 125.2, 117.1, 116.2, 35.0, 28.7, 21.8; IR: 2957, 2863, 1765, 1697, 1450, 1178, 1088, 812, 776  $\text{cm}^{-1}$ ; MS analysis  $m/z$  216 ( $M^+$ , 10%), 201 (20), 167 (40), 149 (100), 113 (12), 57 (40); Anal. Calcd for  $\text{C}_{14}\text{H}_{16}\text{O}_2$ : C, 77.75; H, 7.46. Found: C, 77.49; H, 7.37.

**3-Cyclopentyl-6-methyl-2H-chromen-2-one (3s).** Colorless solid (32 mg, 70%), mp 60-61  $^\circ\text{C}$ ;  $^1\text{H}$  NMR (500 MHz,  $\text{CDCl}_3$ ):  $\delta$  7.44 (s, 1H), 7.27-7.23 (m, 2H), 7.20 (m, 1H), 7.05 (d,  $J = 7.8$  Hz, 1H), 3.15 (qui,  $J = 8.2$  Hz, 1H), 2.40 (s, 3H), 2.12-2.06 (m, 2H),

1.83-1.69 (m, 4H), 1.62-1.55 (m, 2H);  $^{13}\text{C}$  NMR (125 MHz,  $\text{CDCl}_3$ ):  $\delta$  161.9, 152.9, 141.4, 135.9, 132.1, 126.8, 125.3, 117.1, 116.4, 40.6, 31.7, 25.0, 21.6; IR: 2947, 2867, 1766, 1697, 1450, 1178, 1088, 812, 778  $\text{cm}^{-1}$ ; MS analysis  $m/z$  228 ( $\text{M}^+$ , 100%), 200 (12), 187 (40), 171 (24), 157(10), 128 (15); Anal. Calcd for  $\text{C}_{15}\text{H}_{16}\text{O}_2$ : C, 78.92; H, 7.06. Found: C, 79.16; H, 7.16.

**3-Cyclohexyl-7-methoxy-2H-chromen-2-one (3t).** Colorless solid (41 mg, 80%), mp 107-109 °C (Ref.<sup>6</sup> 91.9-92.5 °C);  $^1\text{H}$  NMR (400 MHz,  $\text{CDCl}_3$ ):  $\delta$  7.36 (s, 1H), 7.31 (d,  $J$  = 8.4 Hz, 1H), 6.80 (dd,  $J$  = 8.4, 2.4 Hz, 1H), 6.77 (d,  $J$  = 2.4 Hz, 1H), 3.83 (s, 3H), 2.74-2.67 (m, 1H), 1.96-1.91 (m, 2H), 1.84-1.79 (m, 2H), 1.76-1.72 (m, 1H), 1.47-1.36 (m, 2H), 1.31-1.19 (m, 3H);  $^{13}\text{C}$  NMR (100 MHz,  $\text{CDCl}_3$ ):  $\delta$  161.8, 161.7, 154.3, 136.3, 131.2, 128.1, 113.2, 112.1, 100.3, 55.6, 37.9, 32.1, 26.5, 26.1; IR: 2925, 2872, 1715, 1630, 1473, 1271, 1101, 775, 730  $\text{cm}^{-1}$ ; MS analysis  $m/z$  258 ( $\text{M}^+$ , 100%), 243 (11), 215 (26), 202 (35), 189 (77), 159 (24); Anal. Calcd for  $\text{C}_{16}\text{H}_{18}\text{O}_3$ : C, 74.40; H, 7.02. Found: C, 74.75; H, 7.18.

**2-Tert-butyl-3H-benzo[f]chromen-3-one (3u).** Colorless solid (29 mg, 57%), mp 130-132 °C;  $^1\text{H}$  NMR (500 MHz,  $\text{CDCl}_3$ ):  $\delta$  8.35 (s, 1H), 8.27 (d,  $J$  = 8.0 Hz, 1H), 7.91 (d,  $J$  = 9.0, 1H), 7.90 (d,  $J$  = 8.0 Hz, 1H), 7.70-7.66 (m, 1H), 7.57-7.54 (m, 1H), 7.44 (d,  $J$  = 9.0 Hz, 1H), 1.50 (s, 9H);  $^{13}\text{C}$  NMR (125 MHz,  $\text{CDCl}_3$ ):  $\delta$  159.9, 152.5, 136.1, 132.1, 131.7, 130.2, 129.1, 127.8, 125.6, 121.2, 116.5, 113.1, 35.3, 28.6; IR: 3061, 2946, 1695, 1573, 1356, 1251, 983, 808, 736  $\text{cm}^{-1}$ ; MS analysis  $m/z$  252 ( $\text{M}^+$ , 61%), 237 (100), 209 (60), 165 (30); Anal. Calcd for  $\text{C}_{17}\text{H}_{16}\text{O}_2$ : C, 80.93; H, 6.39. Found: C, 81.32; H, 6.56.

**6-Chloro-3-isopropyl-2H-chromen-2-one (3v).** Colorless solid (32 mg, 73%), mp 102-104 °C;  $^1\text{H}$  NMR (500 MHz,  $\text{CDCl}_3$ ):  $\delta$  7.43 (d,  $J$  = 2.5 Hz, 1H), 7.39 (dd,  $J$  = 8.8, 2.5 Hz, 1H), 7.38 (s, 1H), 7.24 (d,  $J$  = 8.8 Hz, 1H), 3.10 (hpt,  $J$  = 7.0 Hz, 1H), 1.25 (d,  $J$  = 7.0 Hz, 6H);  $^{13}\text{C}$  NMR (125 MHz,  $\text{CDCl}_3$ ):  $\delta$  160.6, 151.2, 137.0, 134.6, 130.3, 129.3, 126.5, 120.6, 117.7, 28.8, 21.3; IR: 3054, 2961, 1715, 1468, 1250, 1150, 1004, 816  $\text{cm}^{-1}$ ; MS analysis  $m/z$  222 ( $\text{M}^+$ , 63%), 207 (100), 194 (54), 179 (36), 115 (50); Anal. Calcd for  $\text{C}_{12}\text{H}_{11}\text{ClO}_2$ : C, 64.73; H, 4.98. Found: C, 64.98; H, 5.10.

**3-Phenyl-2H-chromen-2-one (4a).** Colorless solid, isolated yield 40% (18 mg, 40%), mp 134-136 °C (Ref.<sup>7</sup> 136-137 °C);  $^1\text{H}$  NMR (500 MHz,  $\text{CDCl}_3$ ):  $\delta$  7.81 (s, 1H), 7.71-7.69 (m, 2H), 7.55-7.50 (m, 2H), 7.46-7.39 (m, 3H), 7.36 (d,  $J$  = 8.2 Hz, 1H), 7.29 (tt,  $J$  = 7.5, 1.2 Hz, 1H);  $^{13}\text{C}$  NMR (125 MHz,  $\text{CDCl}_3$ ):  $\delta$  160.6, 153.6, 139.9, 134.8, 131.5, 128.9, 128.6, 128.5, 128.4, 128.0, 124.6, 119.7, 116.5; Anal. Calcd for  $\text{C}_{15}\text{H}_{10}\text{O}_2$ : C, 81.07; H, 4.54. Found: C, 81.36; H, 4.65.

<sup>6</sup> Wang, C.; Mi, X.; Li, Q.; Li, Y.; Huang, M.; Zhang, J.; Wu, Y. *Tetrahedron*, **2015**, *71*, 6689.

<sup>7</sup> Zeng, H. Y.; Li, C. *J. Angew. Chem. Int. Ed.*, **2014**, *53*, 13862.

**3-p-Tolyl-2H-chromen-2-one (4b).** Colorless solid (25 mg, 53%), mp 144-146 °C (Ref.<sup>7</sup> 158-159 °C); <sup>1</sup>H NMR (500 MHz, CDCl<sub>3</sub>): δ 7.79 (s, 1H), 7.62-7.60 (m, 1H), 7.61 (d, *J* = 8.2, Hz, 1H), 7.54-7.50 (m, 2H), 7.36 (d, *J* = 8.2 Hz, 1H), 7.29 (td, *J* = 7.5, 1.1 Hz, 1H), 7.27 (d, *J* = 7.5 Hz, 2H), 2.40 (s, 3H); <sup>13</sup>C NMR (125 MHz, CDCl<sub>3</sub>): δ 160.8, 153.5, 139.3, 139.0, 131.9, 131.3, 129.3, 128.5, 128.5, 127.9, 124.5, 119.9, 116.5, 21.4; Anal. Calcd for C<sub>16</sub>H<sub>12</sub>O<sub>2</sub>: C, 81.34; H, 5.12. Found: C, 81.68; H, 5.26.

# Compound 3a

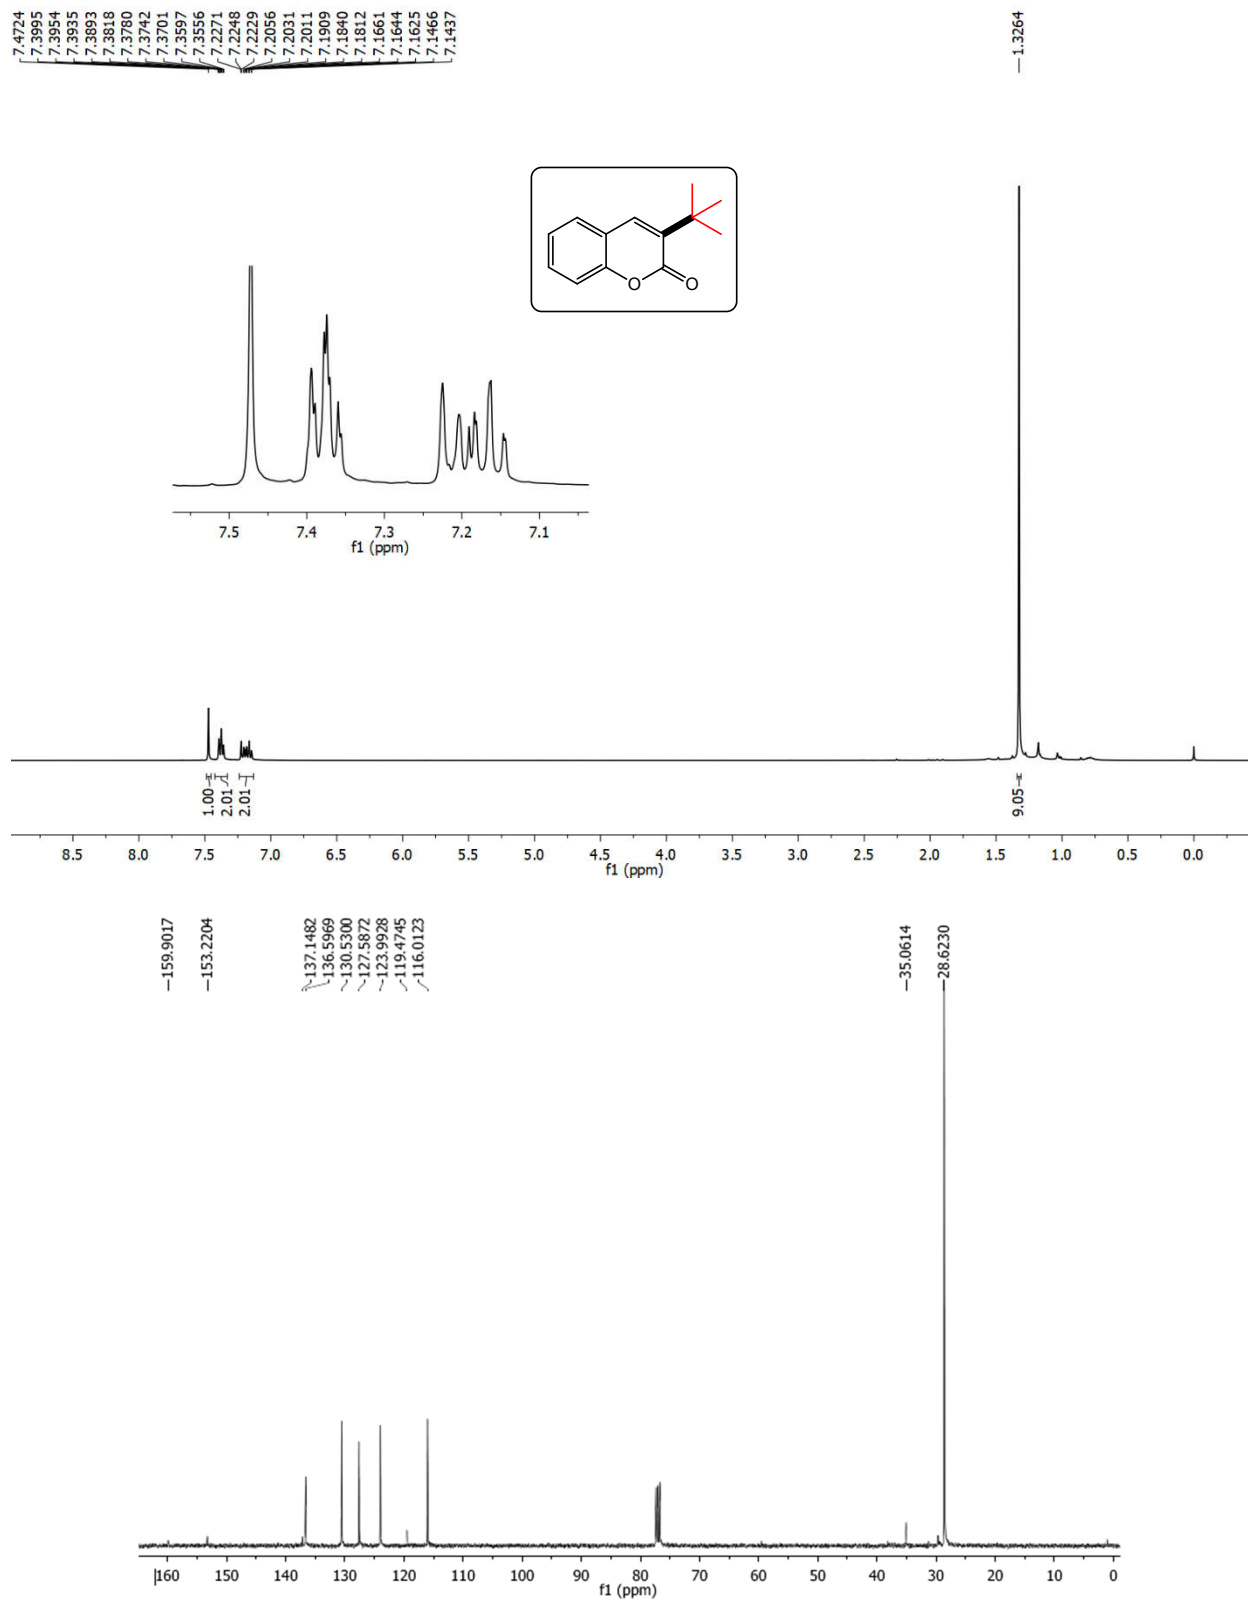



# Compound 3b

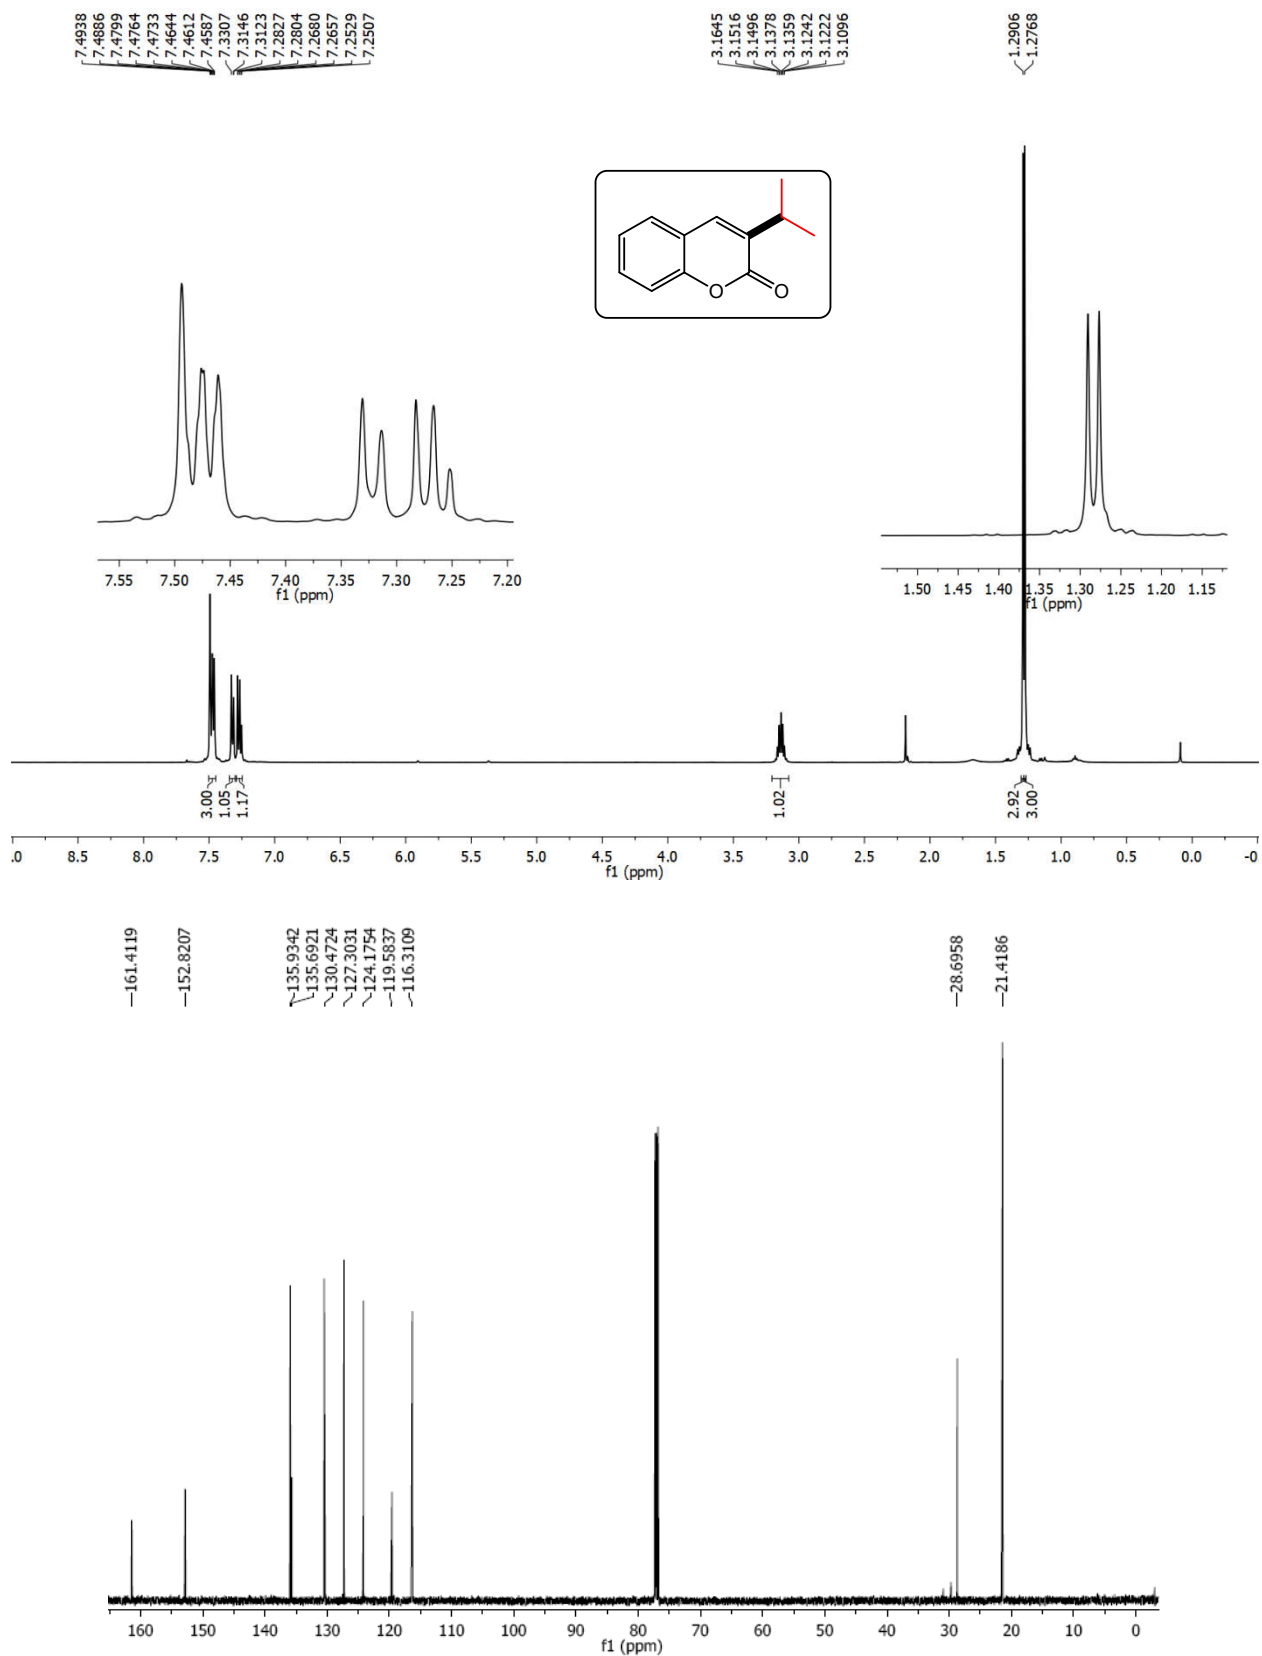

# Compound 3c

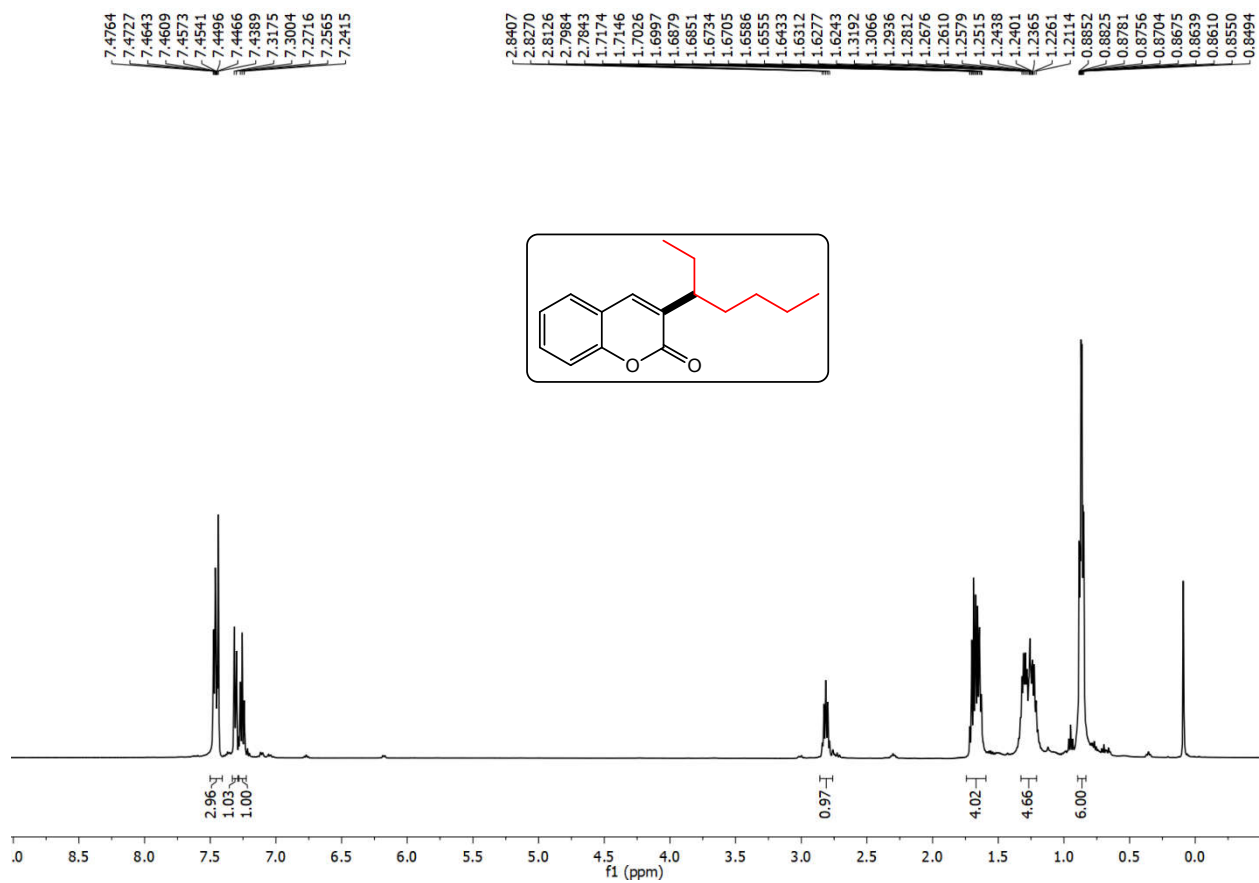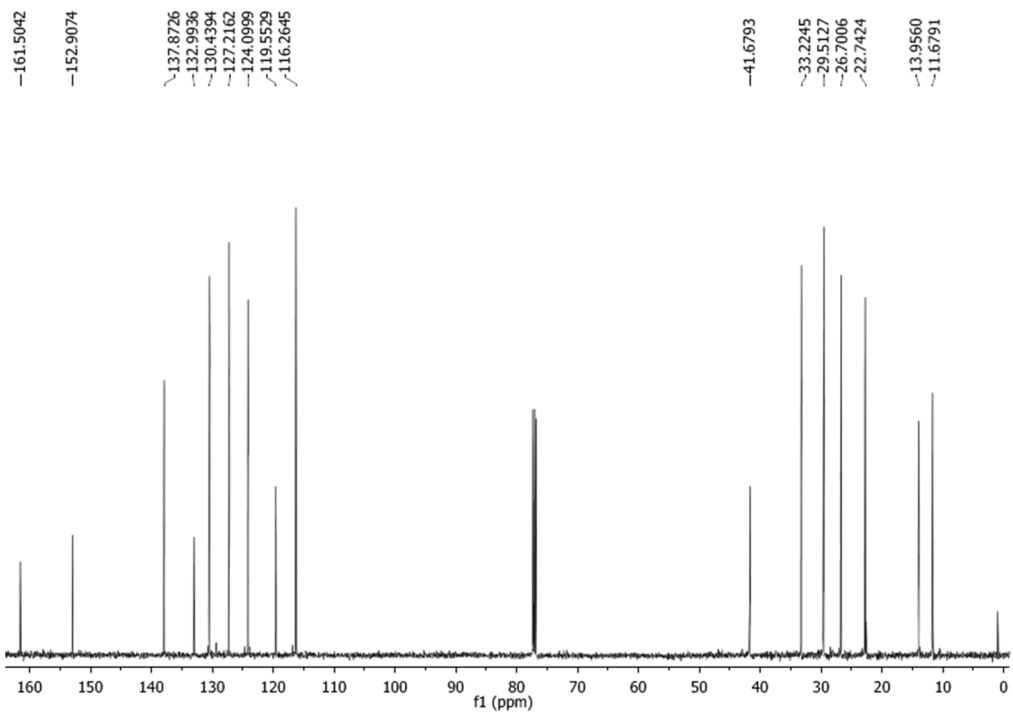

# Compound 3d

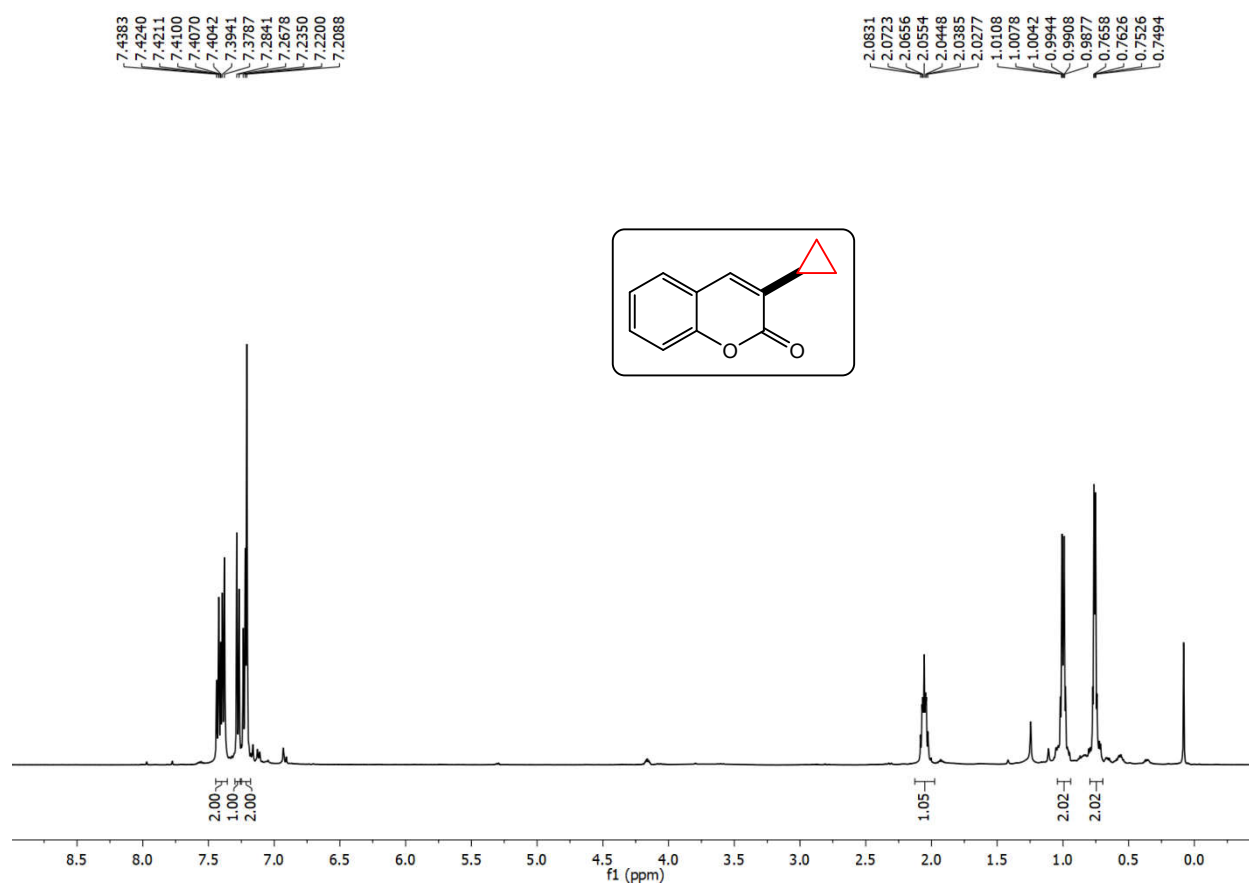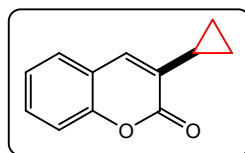

Chemical shift values (ppm): -161.8403, -152.4989, -134.4099, -131.4193, -130.2827, -127.0111, -124.2413, -119.4349, -116.2534, -11.2968, -7.7121.

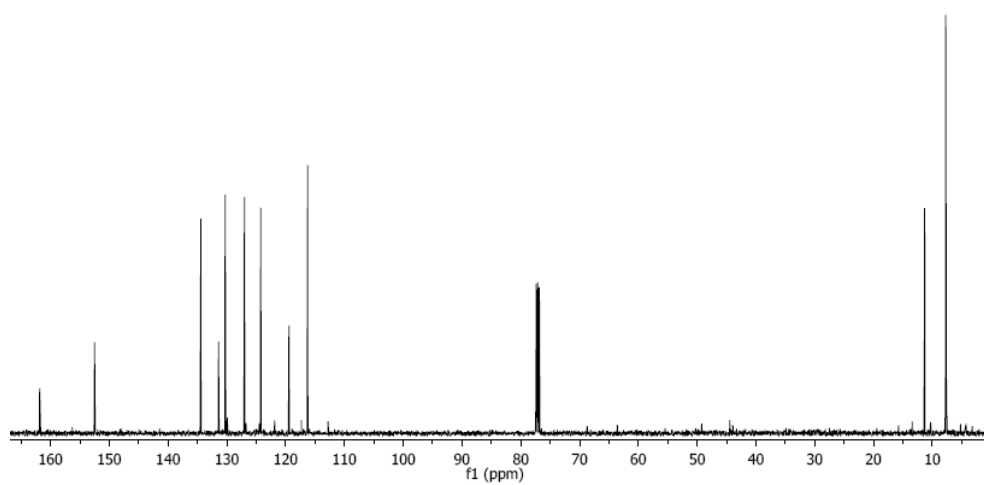

Compound **3e**

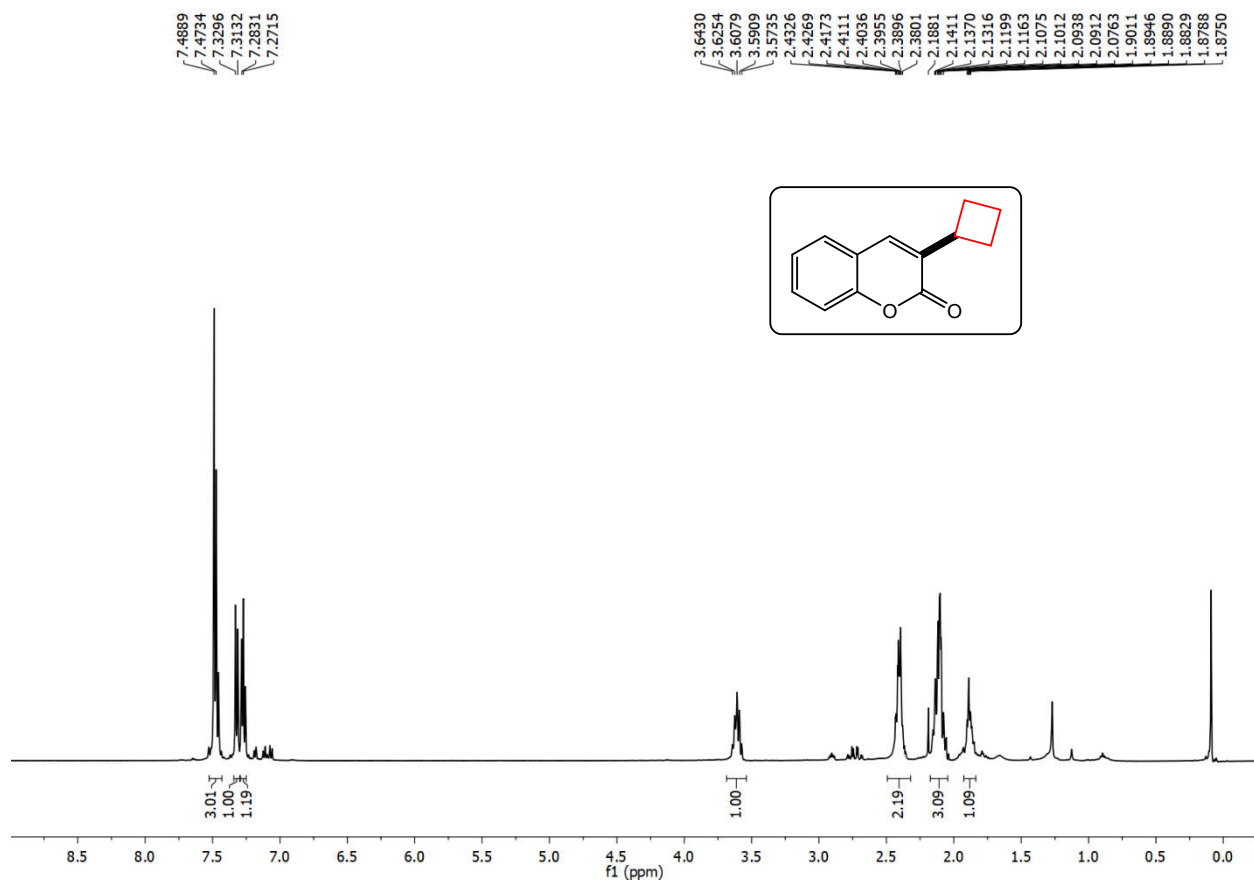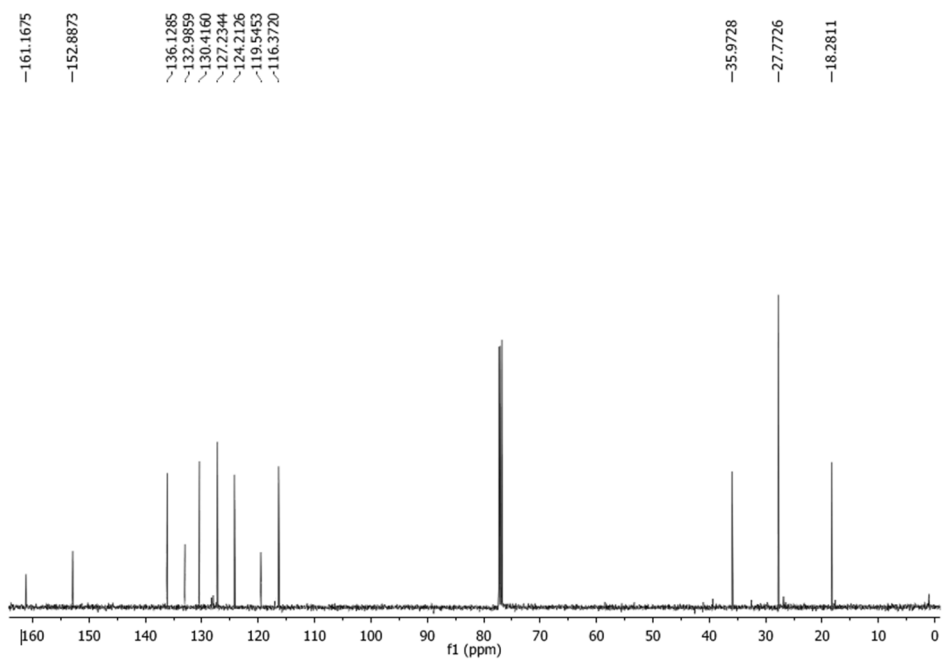

# Compound 3f

7.5053  
7.4837  
7.4806  
7.4656  
7.4590  
7.4496  
7.4435  
7.3300  
7.3137  
7.2737  
7.2594  
7.2442  
3.1807  
3.1639  
3.1471  
2.1409  
2.1292  
2.1261  
2.1189  
2.1151  
2.1042  
2.0941  
2.0869  
2.0813  
1.8414  
1.8357  
1.8277  
1.8193  
1.8110  
1.8050  
1.7984  
1.7932  
1.7860  
1.7757  
1.7695  
1.7661  
1.7544  
1.7475  
1.7387  
1.7324  
1.7228  
1.7148  
1.7080  
1.6389  
1.6228  
1.6164  
1.6117  
1.6057  
1.5981  
1.5933  
1.5886  
1.5815  
1.5737  
1.5655

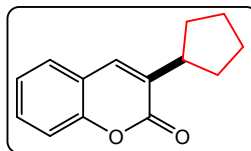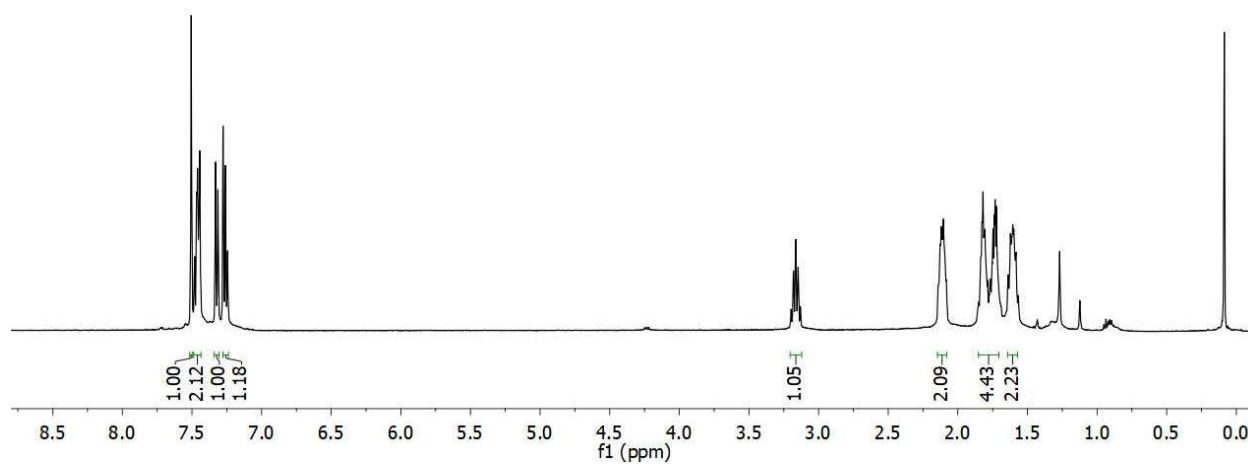

-161.7097  
-152.8342  
135.9877  
133.4707  
130.3849  
127.2164  
124.1604  
119.5798  
116.3074  
40.7137  
31.7165  
25.0693

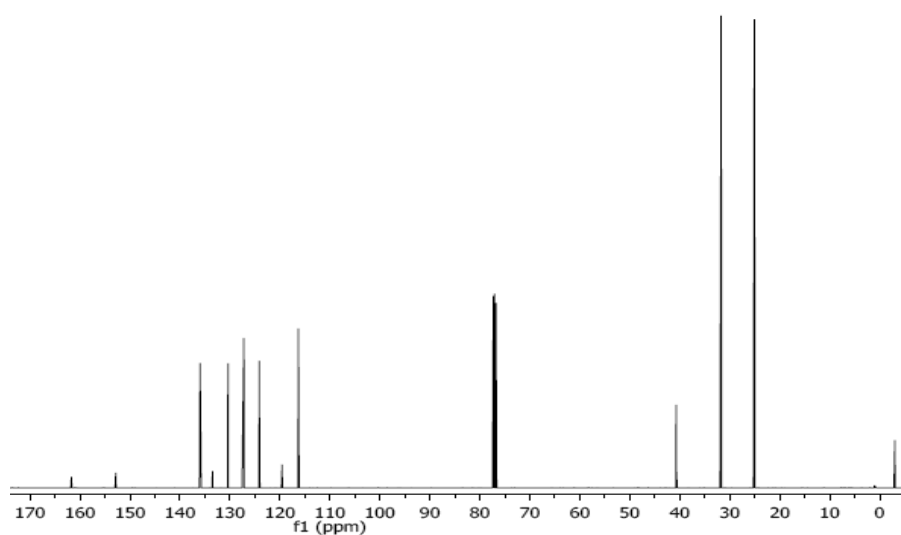

# Compound 3g

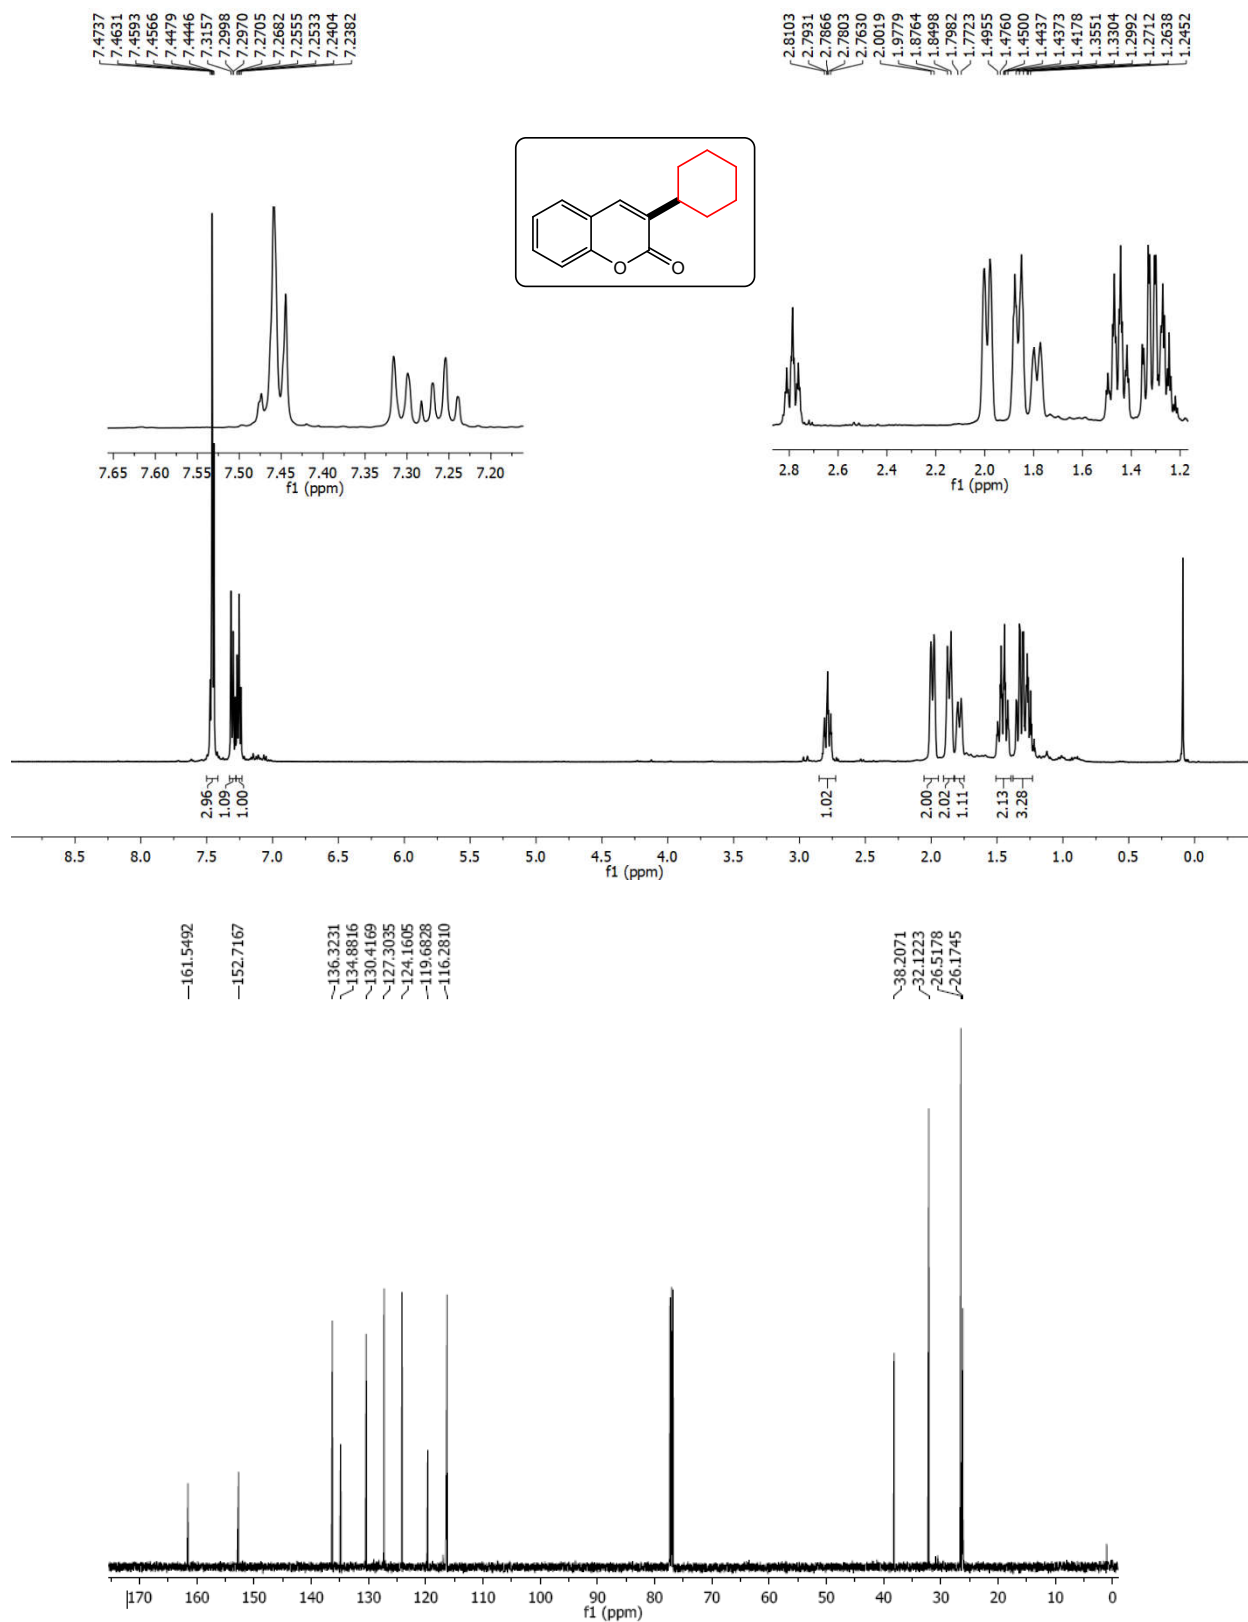

# Compound 3h

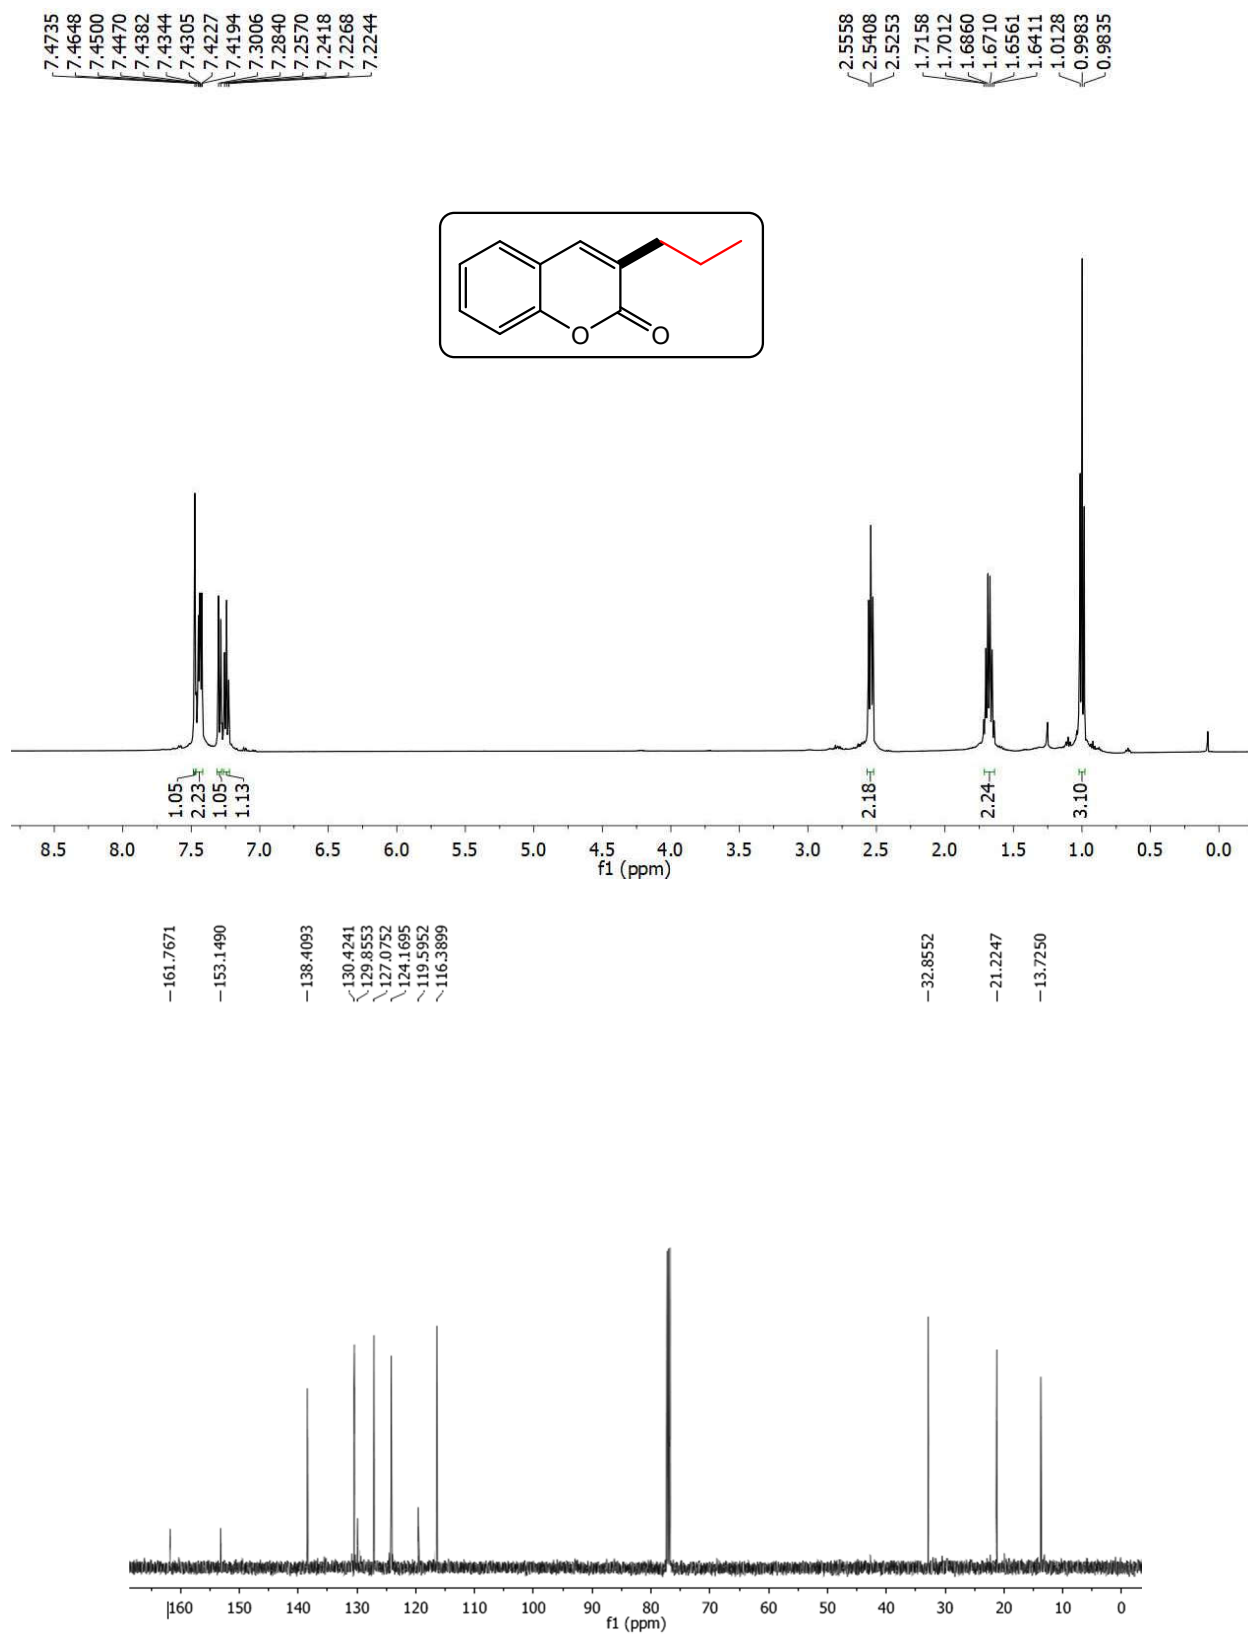

# Compound 3i

7.4478  
7.4442  
7.4403  
7.4364  
7.4027  
7.3986  
7.3846  
7.3812  
7.3778  
7.3638  
7.3597  
7.3528  
7.3488  
7.3332  
7.3293  
7.2408  
7.2212  
7.2192  
7.1940  
7.1918  
7.1888  
7.1730  
7.1701  
7.1542  
7.1513

2.1428  
2.1393

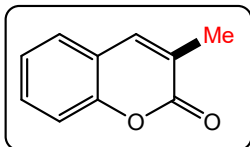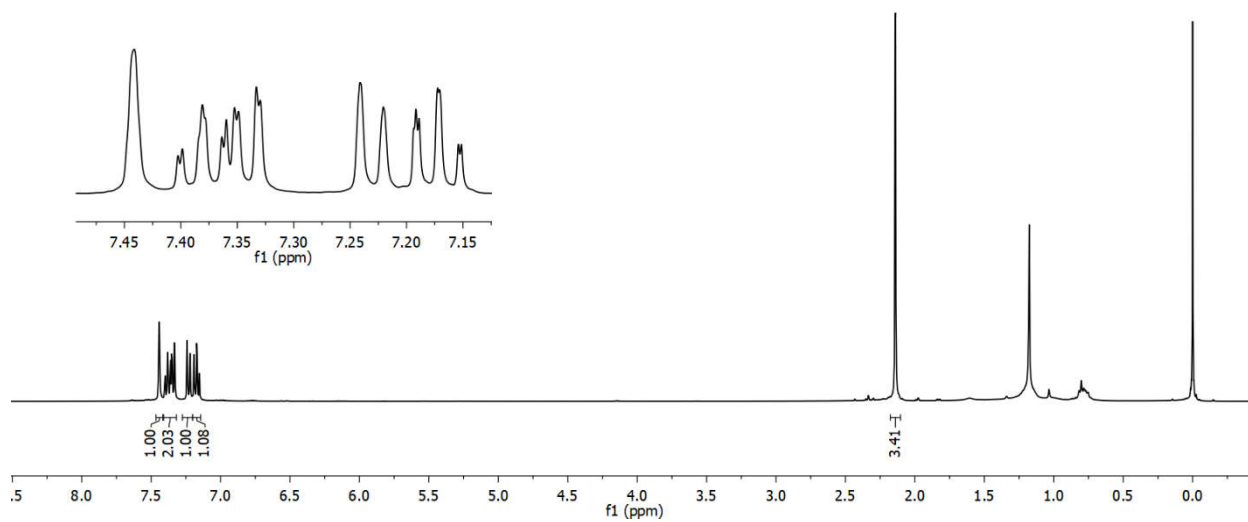

-162.3429  
-153.3428  
-139.3488  
-130.5633  
-127.0554  
-125.9368  
-124.3769  
-119.6941  
-116.5615  
-17.2954

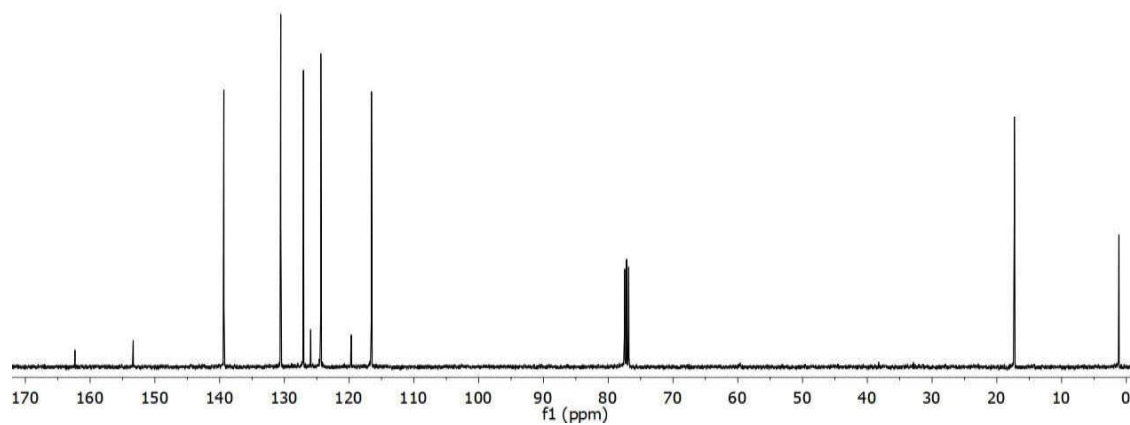



Compound **3k**

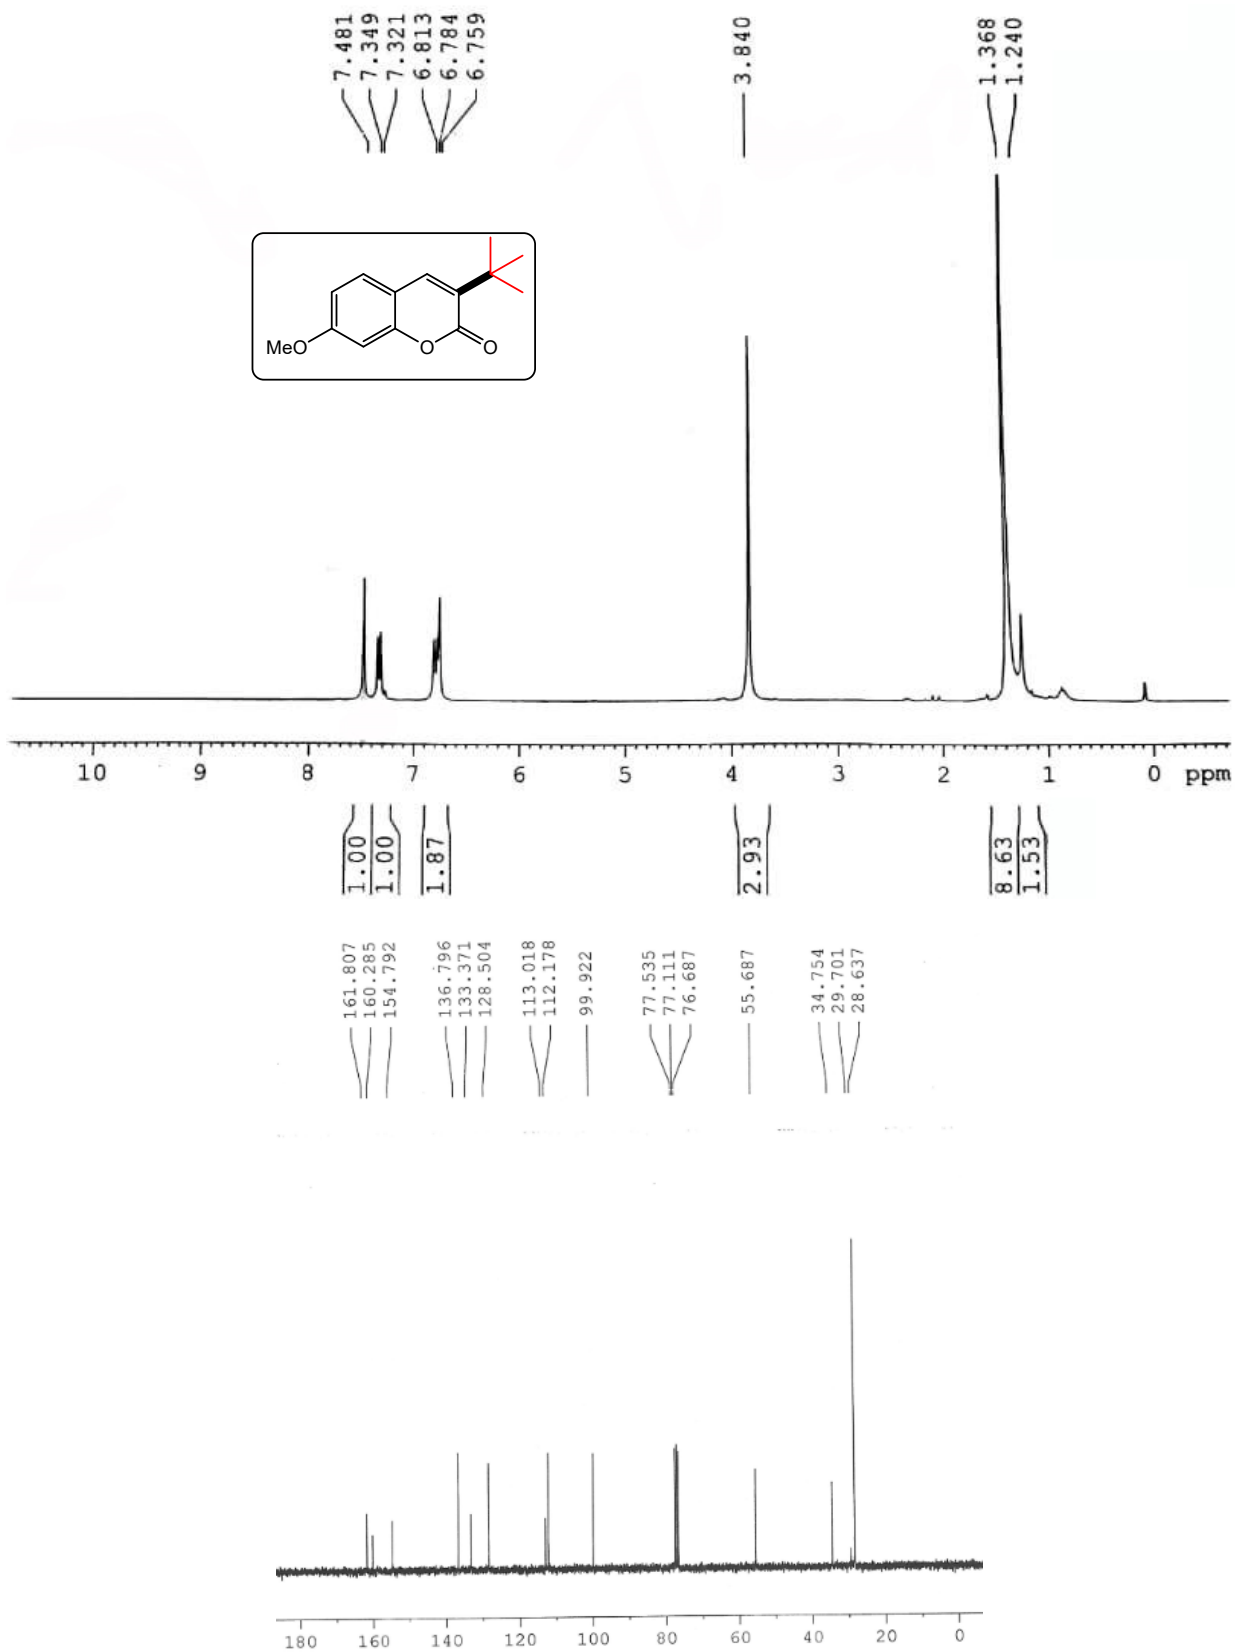

# Compound 31

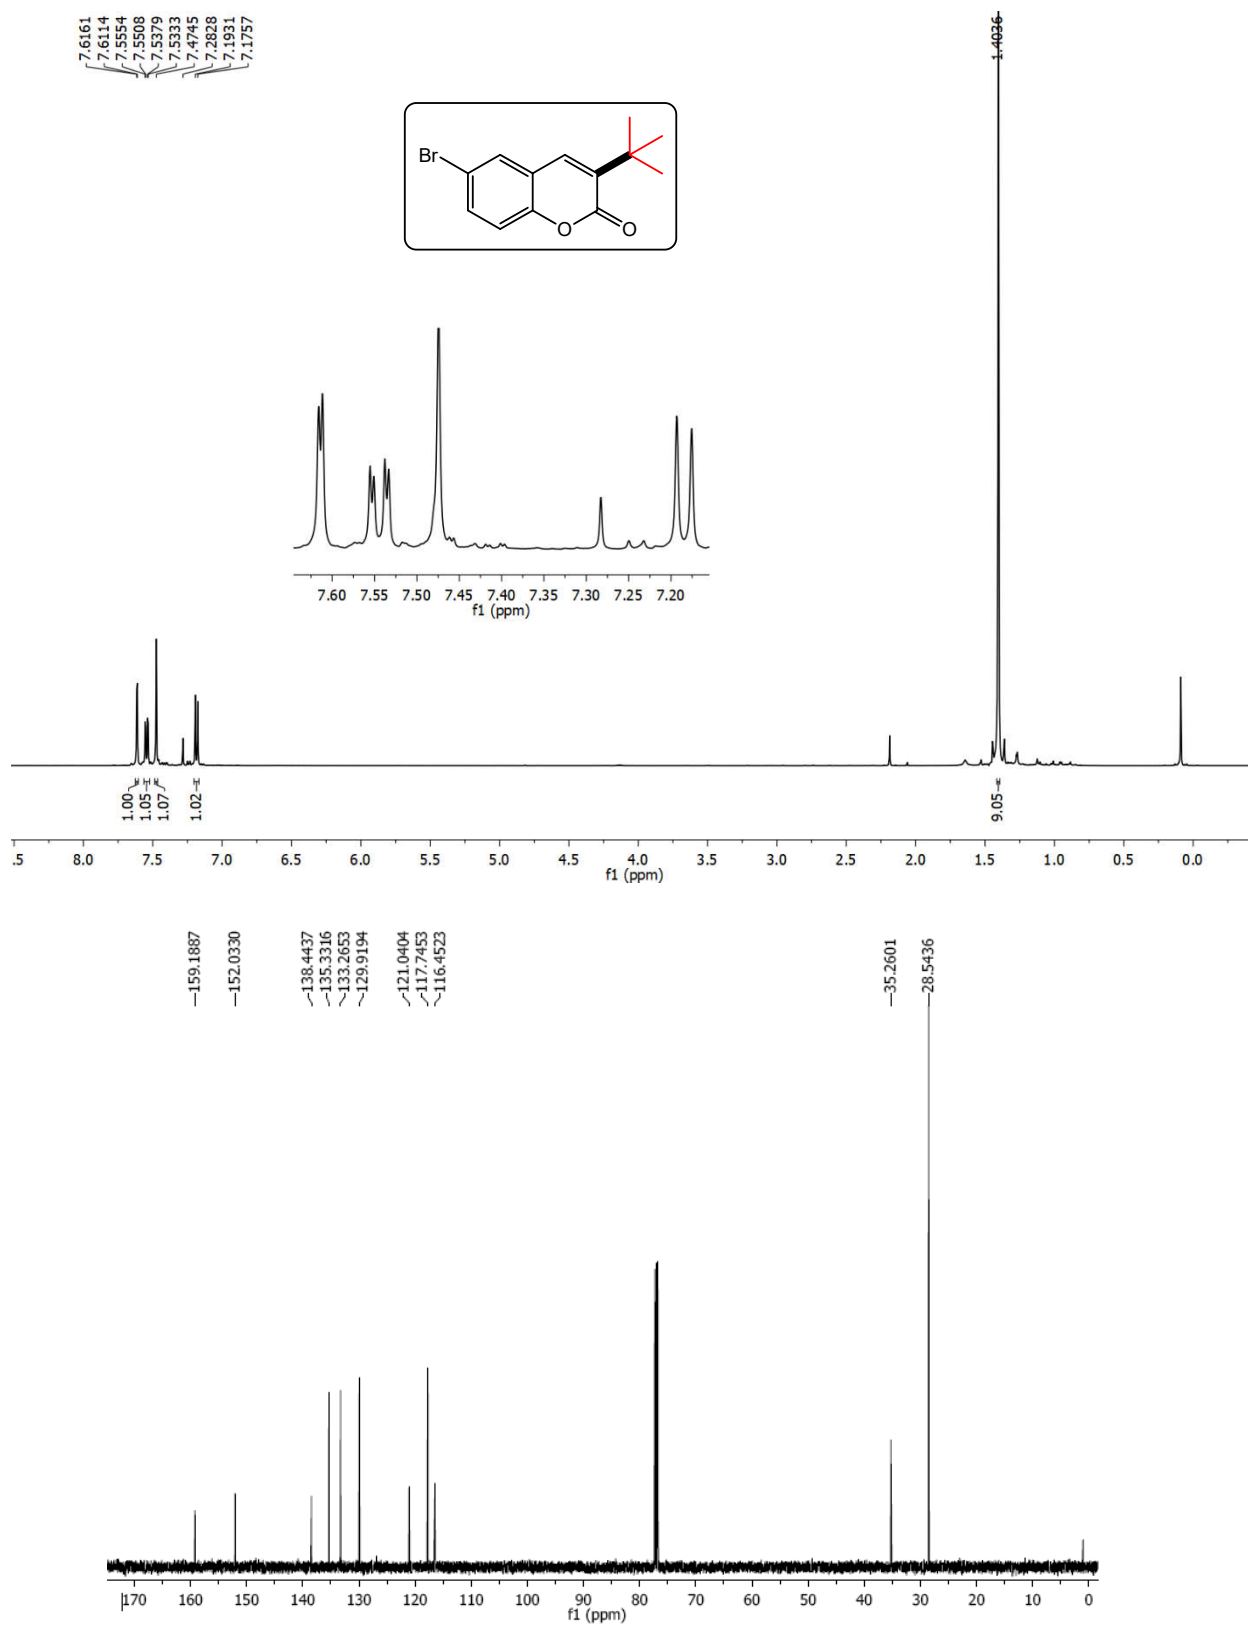

# Compound 3m

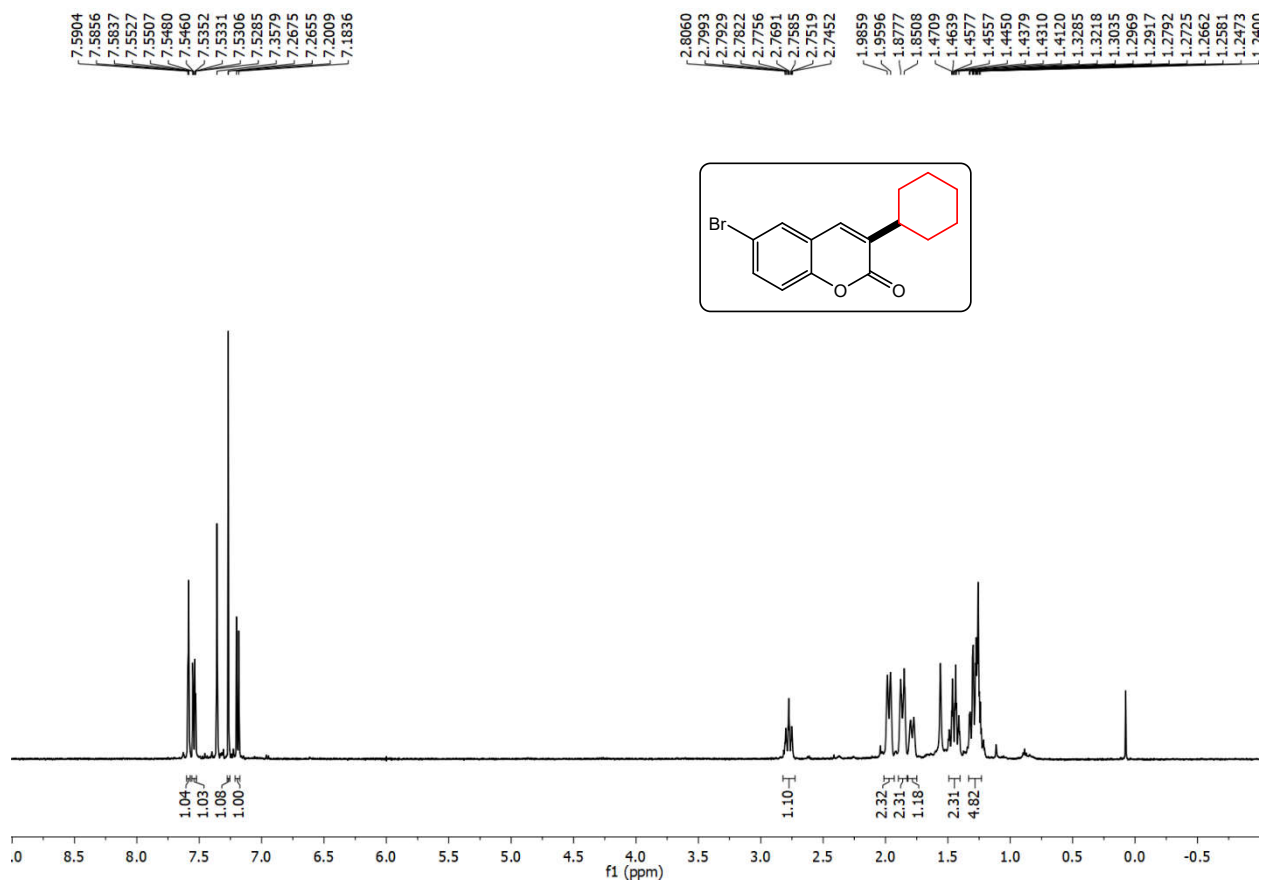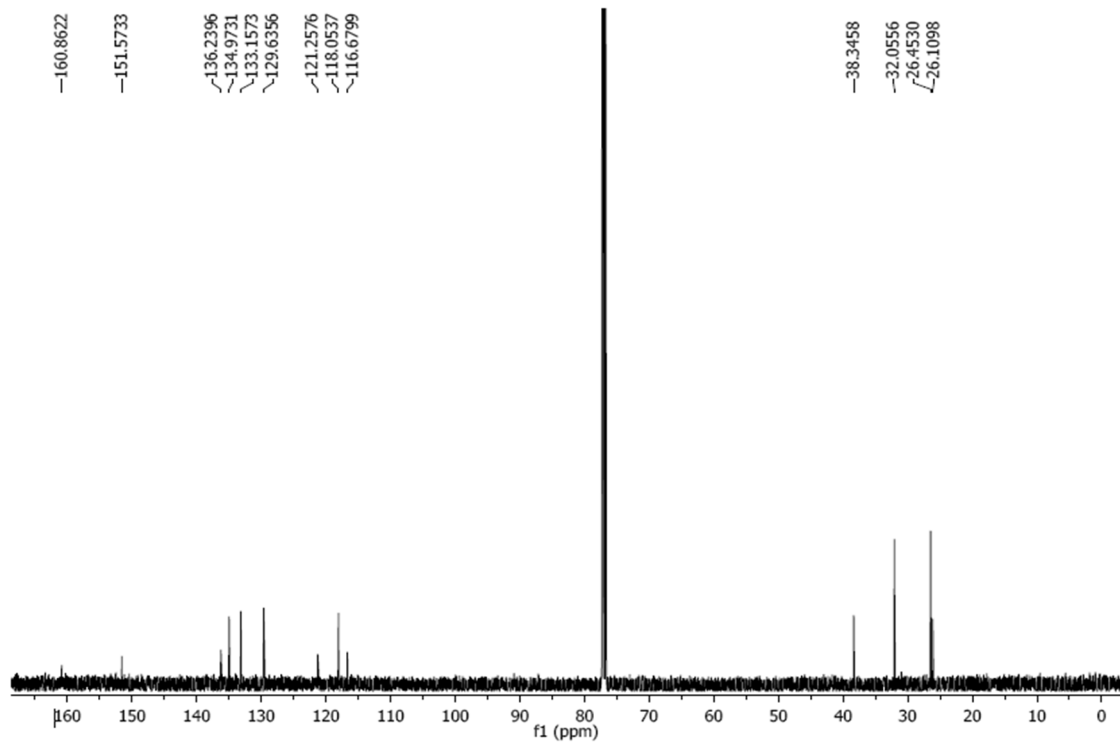

# Compound 3n

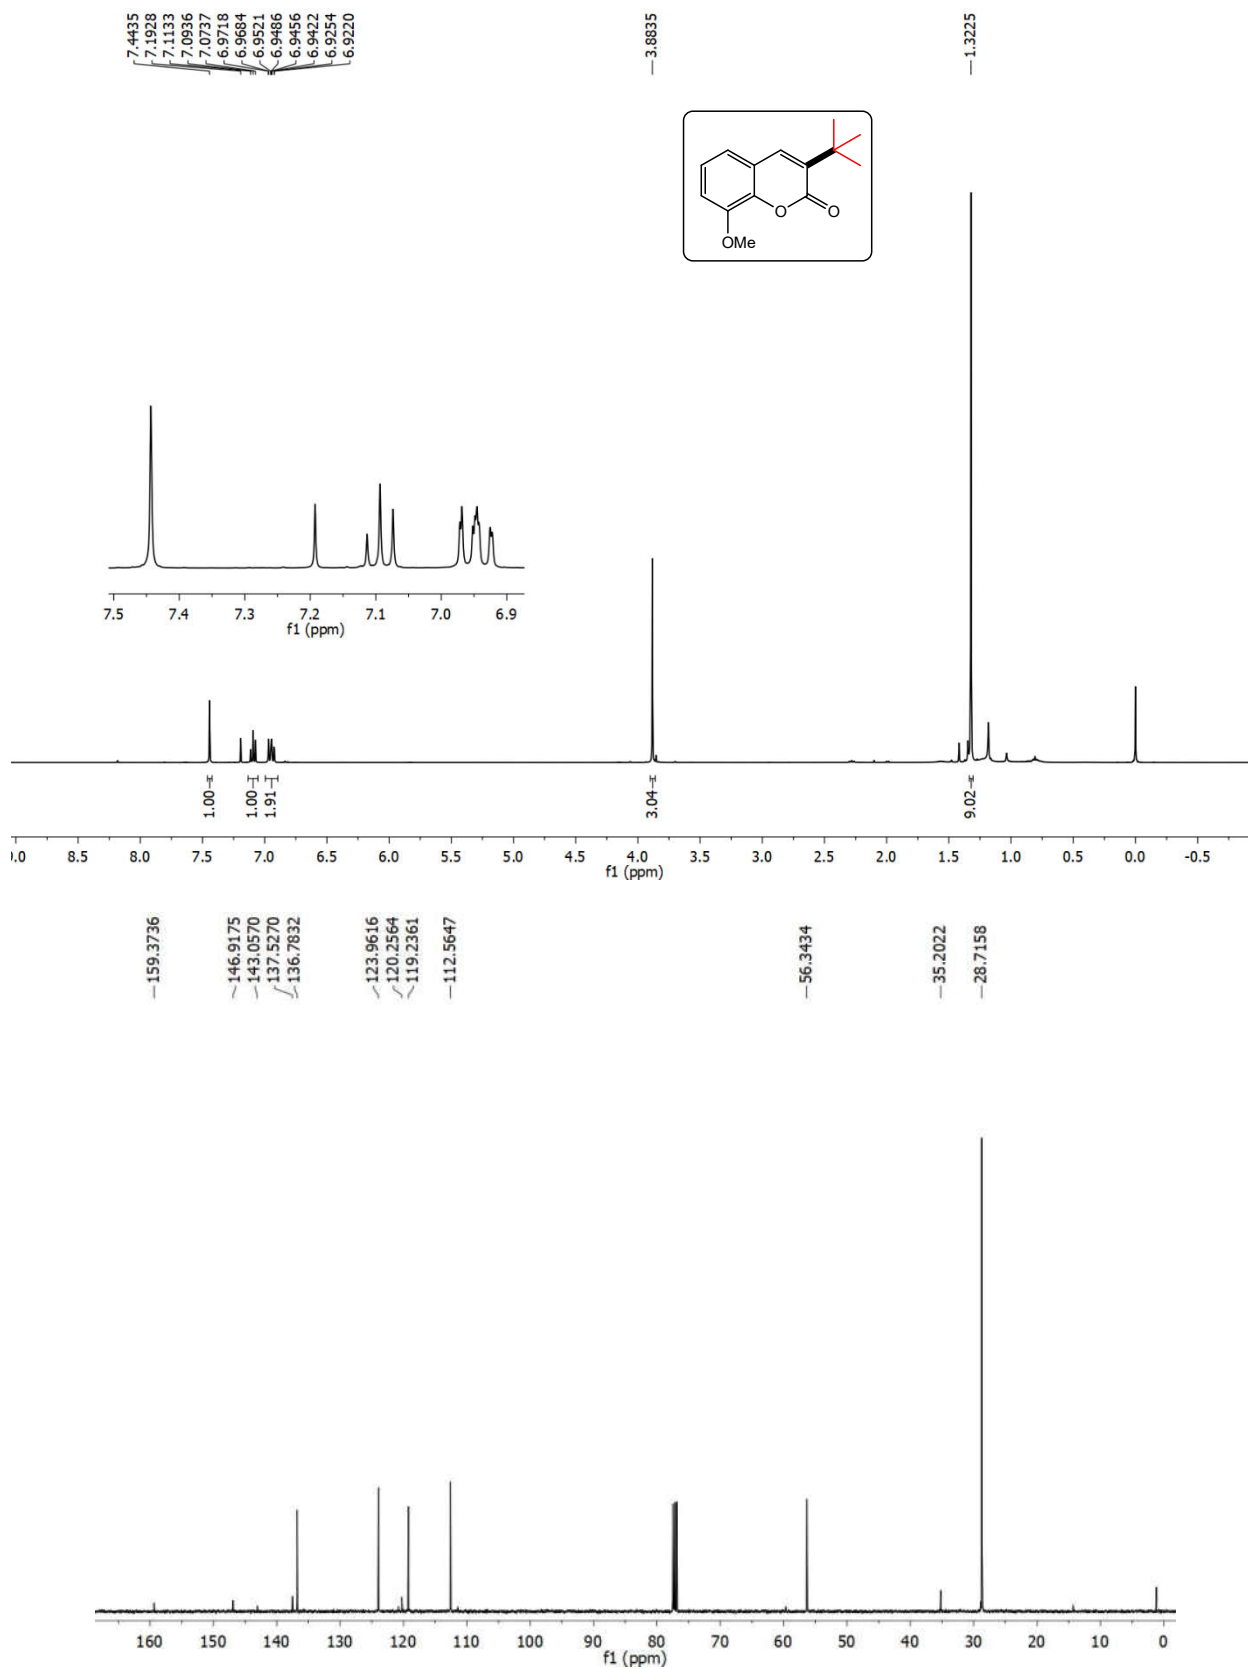

# Compound 30

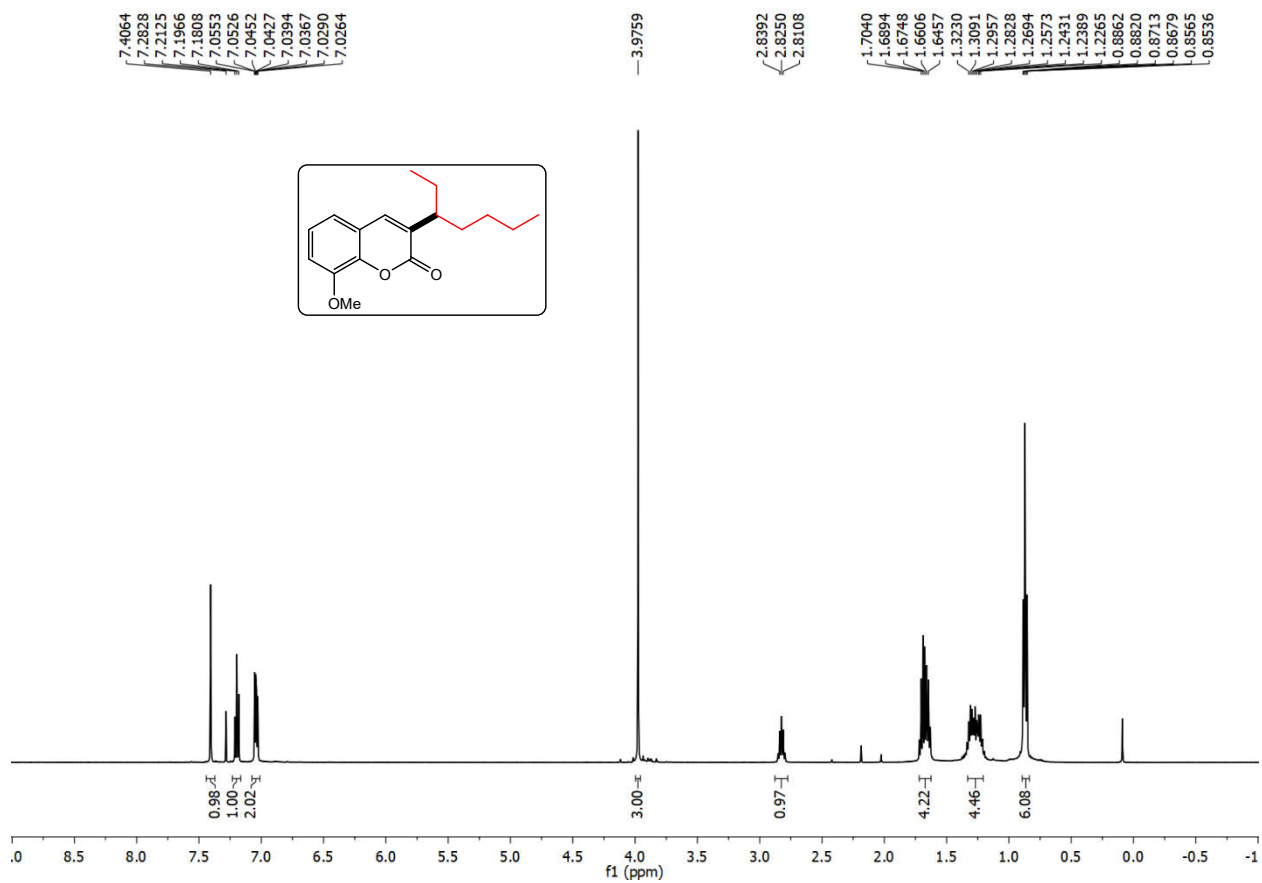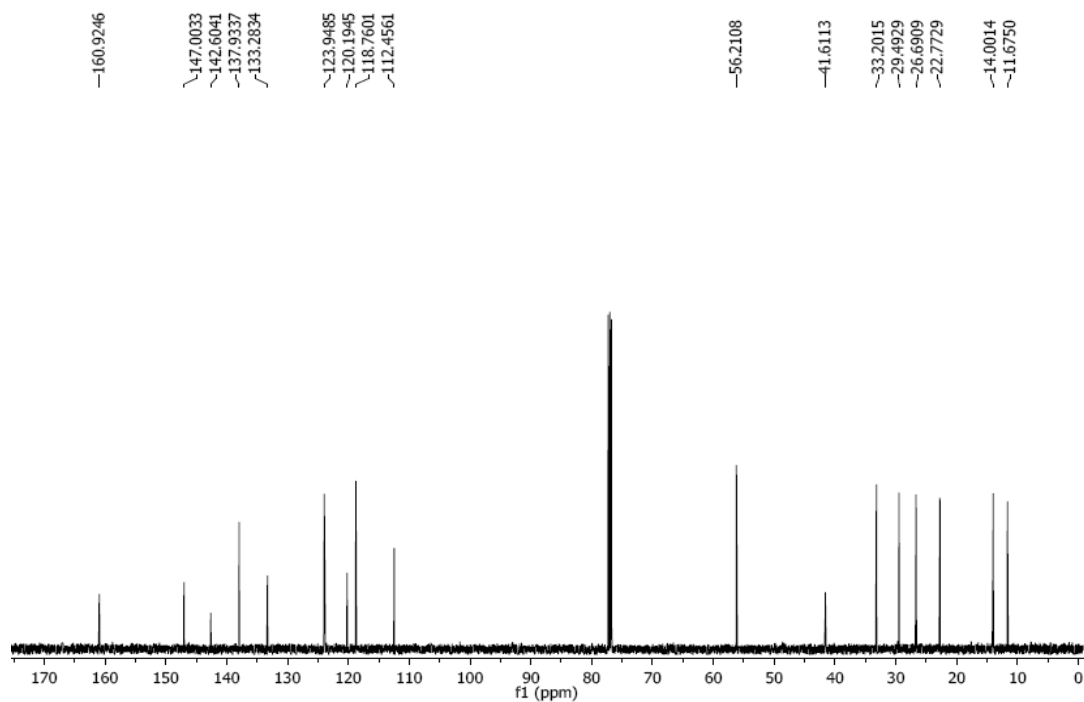

Compound **3p**

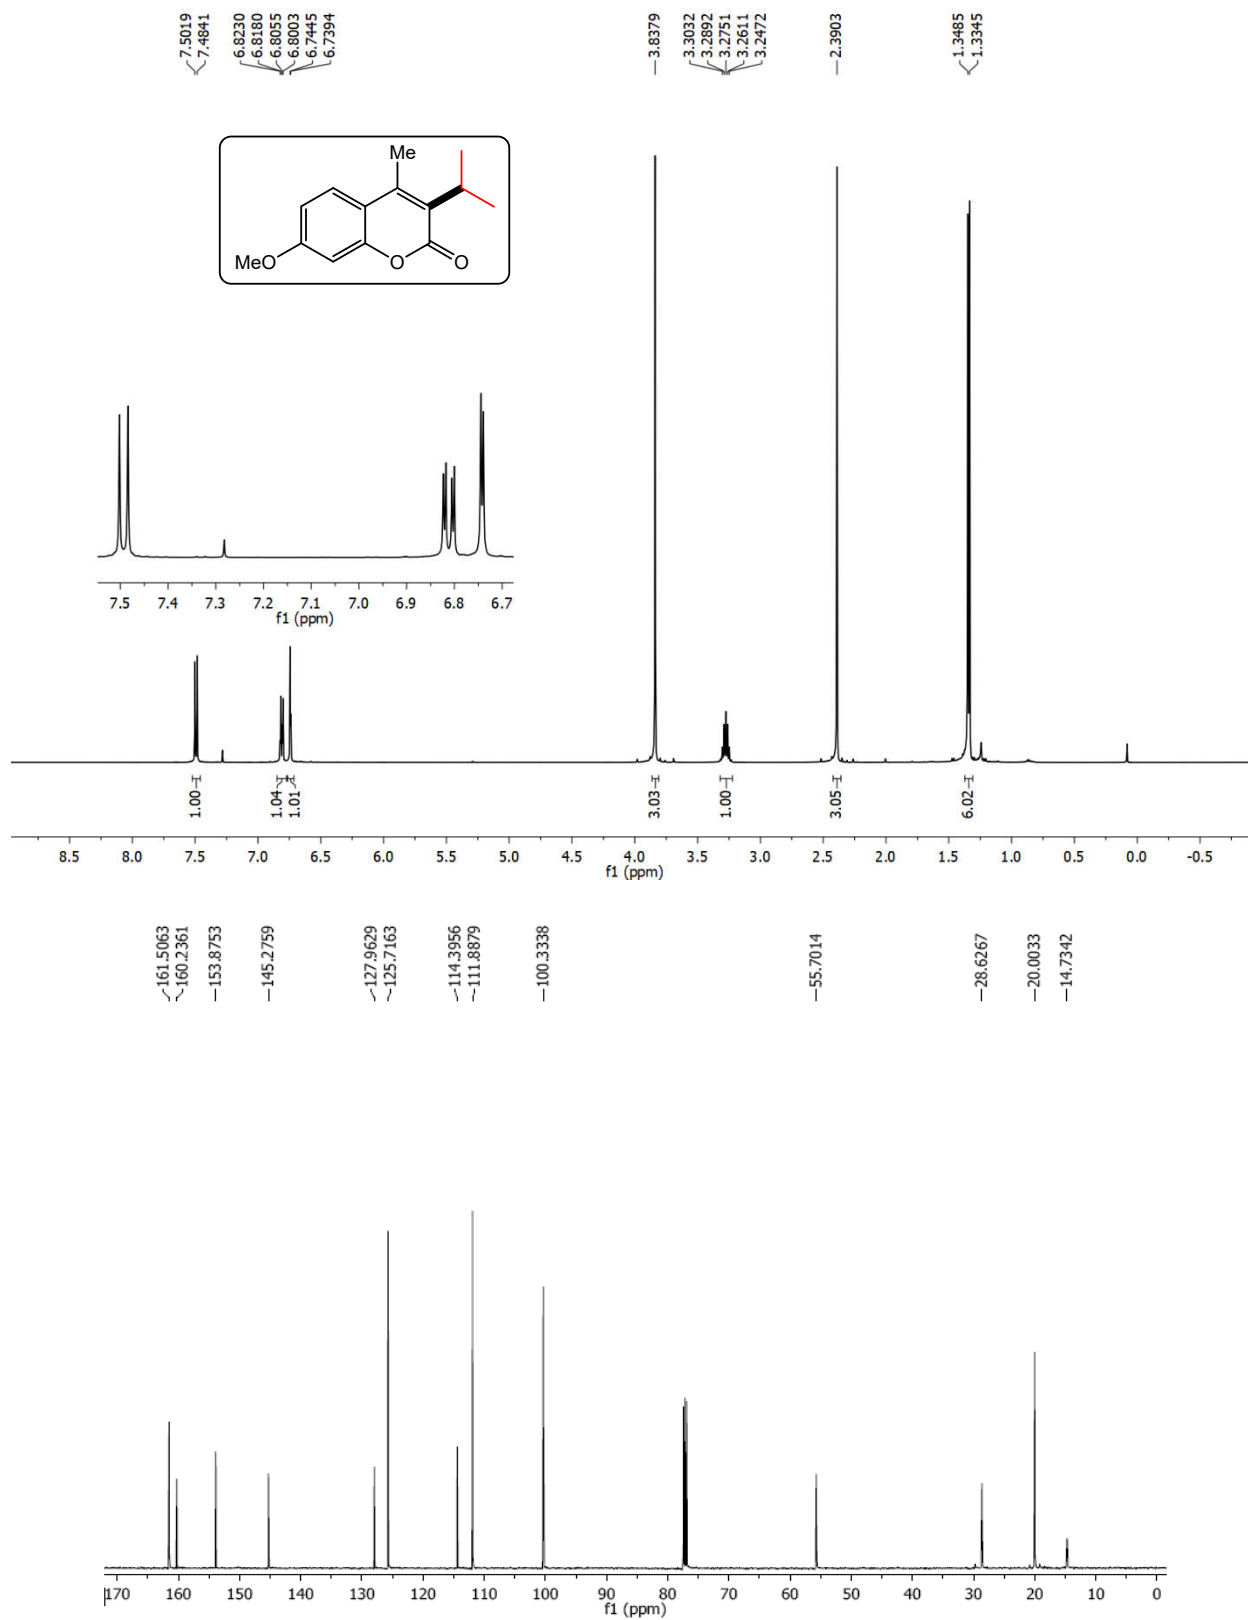

# Compound 3q

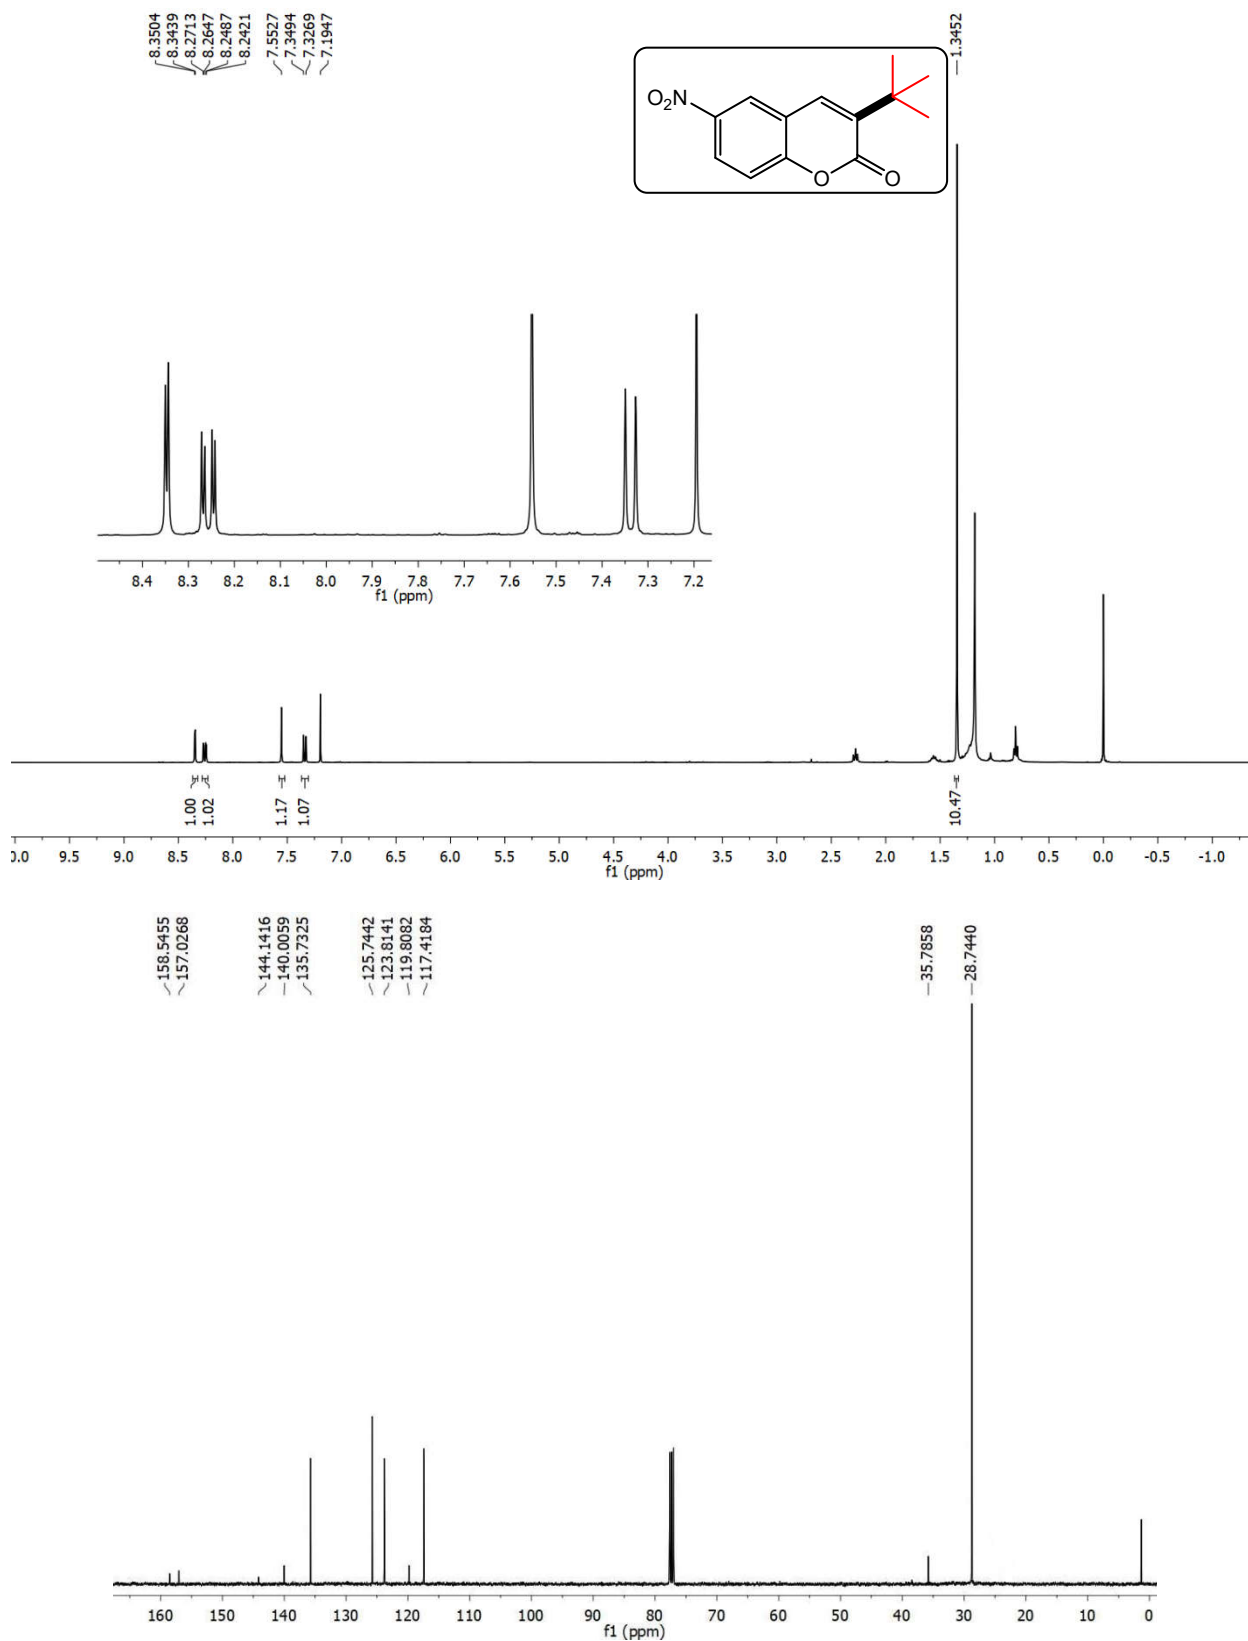

# Compound 3r

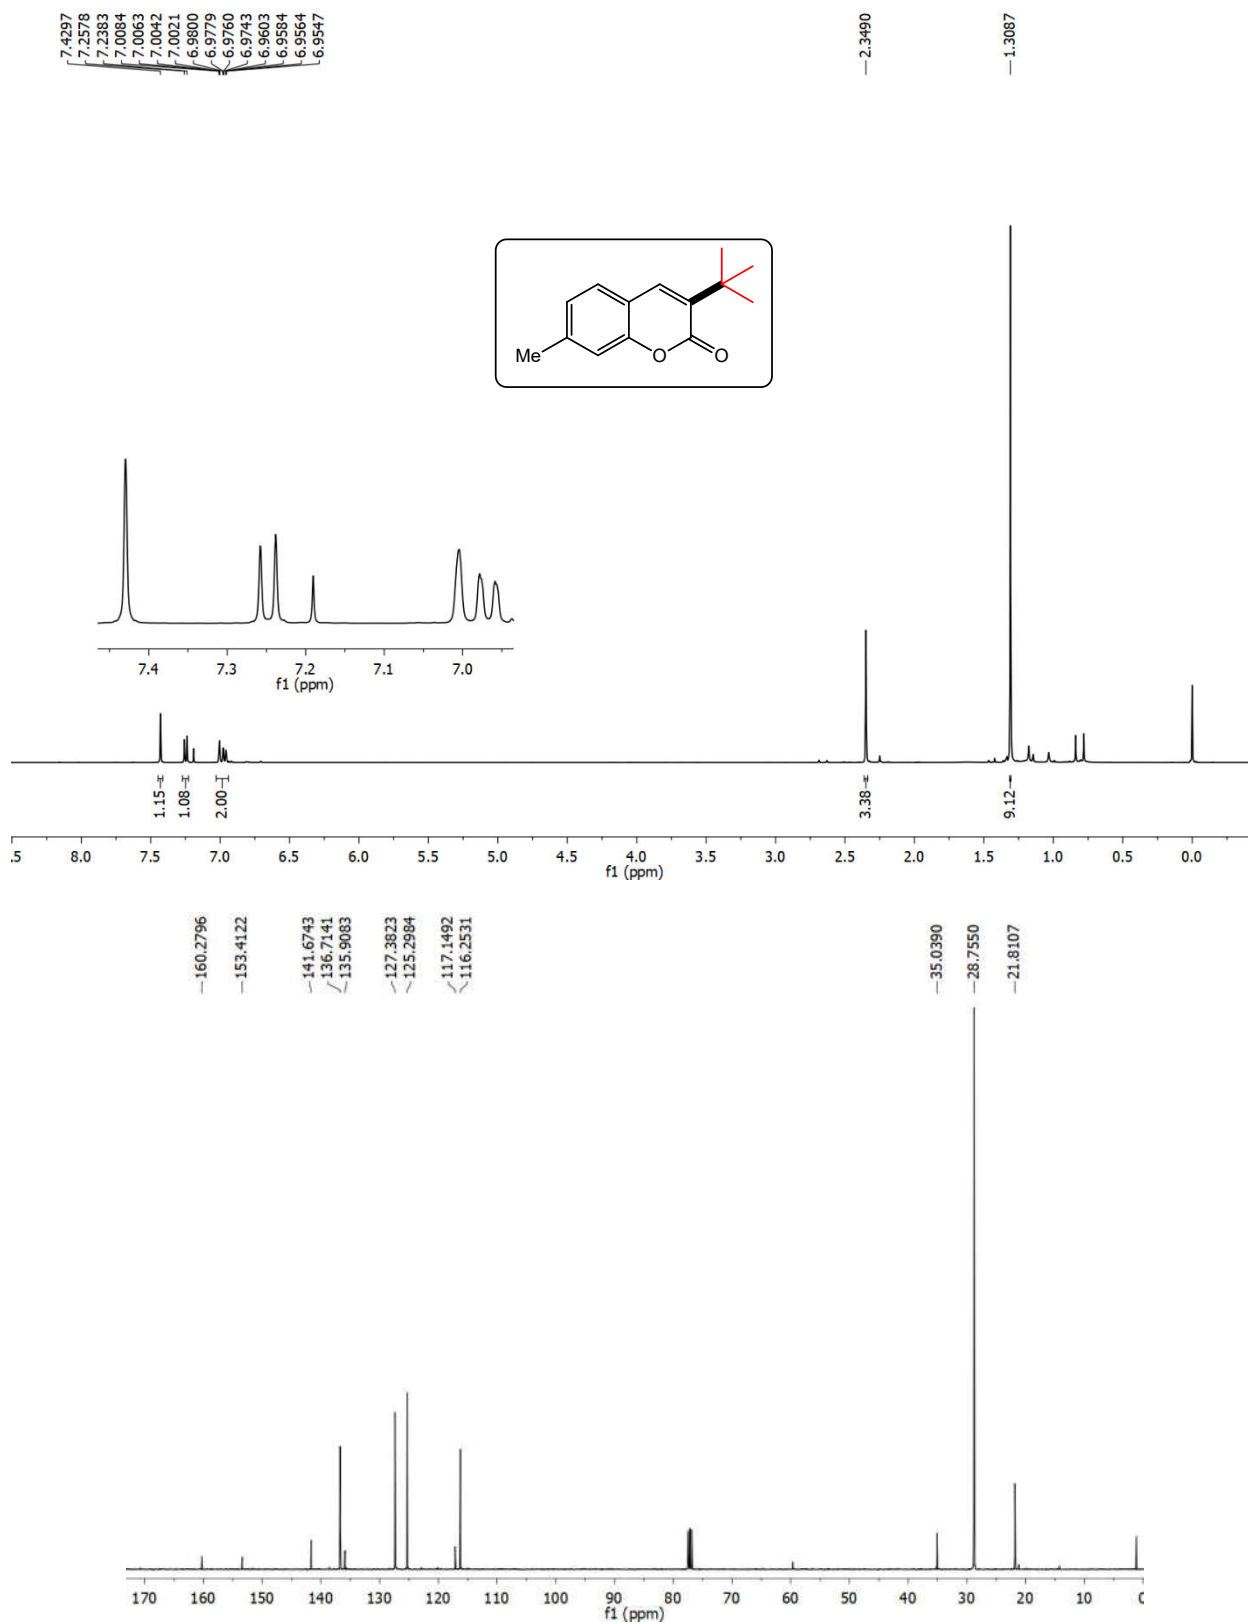



# Compound 3s

7.4466  
7.2706  
7.2583  
7.2544  
7.2353  
7.2155  
7.1989  
3.1860  
3.1695  
3.1526  
3.1358  
3.1189  
2.4047  
2.1296  
2.1150  
2.1059  
2.1020  
2.0946  
2.0901  
2.0819  
2.0741  
2.0693  
1.8309  
1.8257  
1.8177  
1.8112  
1.8081  
1.8011  
1.7951  
1.7865  
1.7818  
1.7760  
1.7643  
1.7599  
1.7568  
1.7495  
1.7460  
1.7393  
1.7303  
1.7242  
1.7147  
1.7066  
1.6998  
1.6236  
1.6134  
1.6073  
1.6001  
1.5955  
1.5901  
1.5826  
1.5771  
1.5736  
1.5664  
1.5515

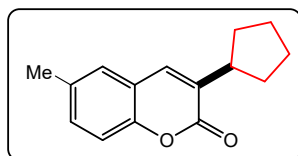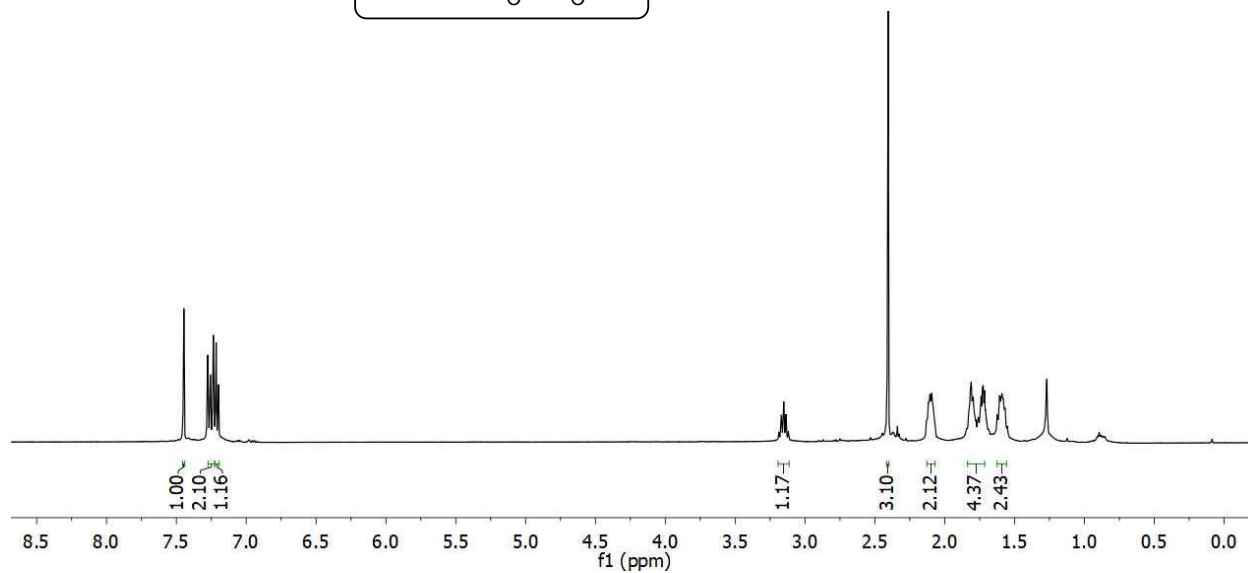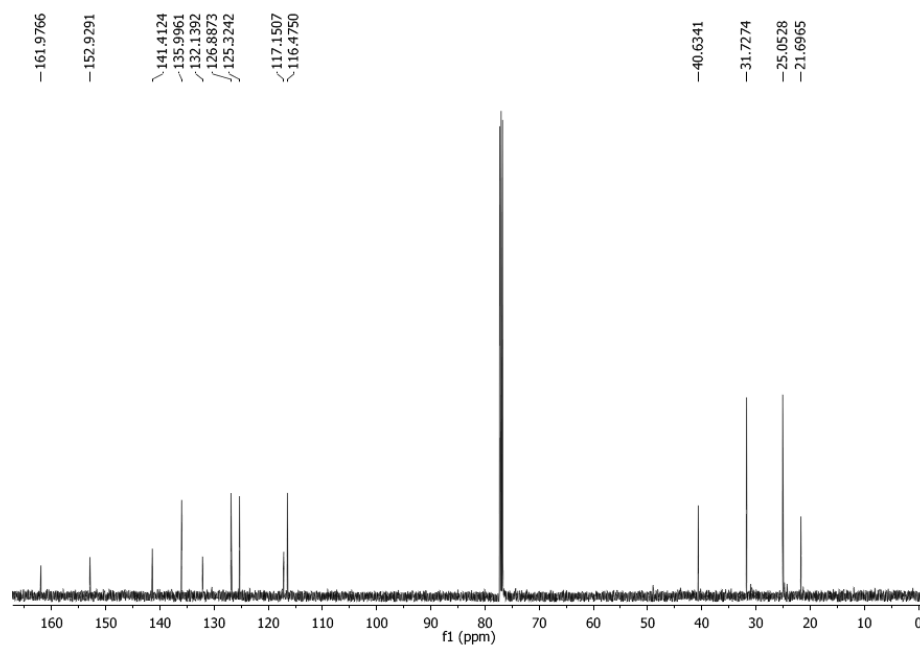

# Compound 3t

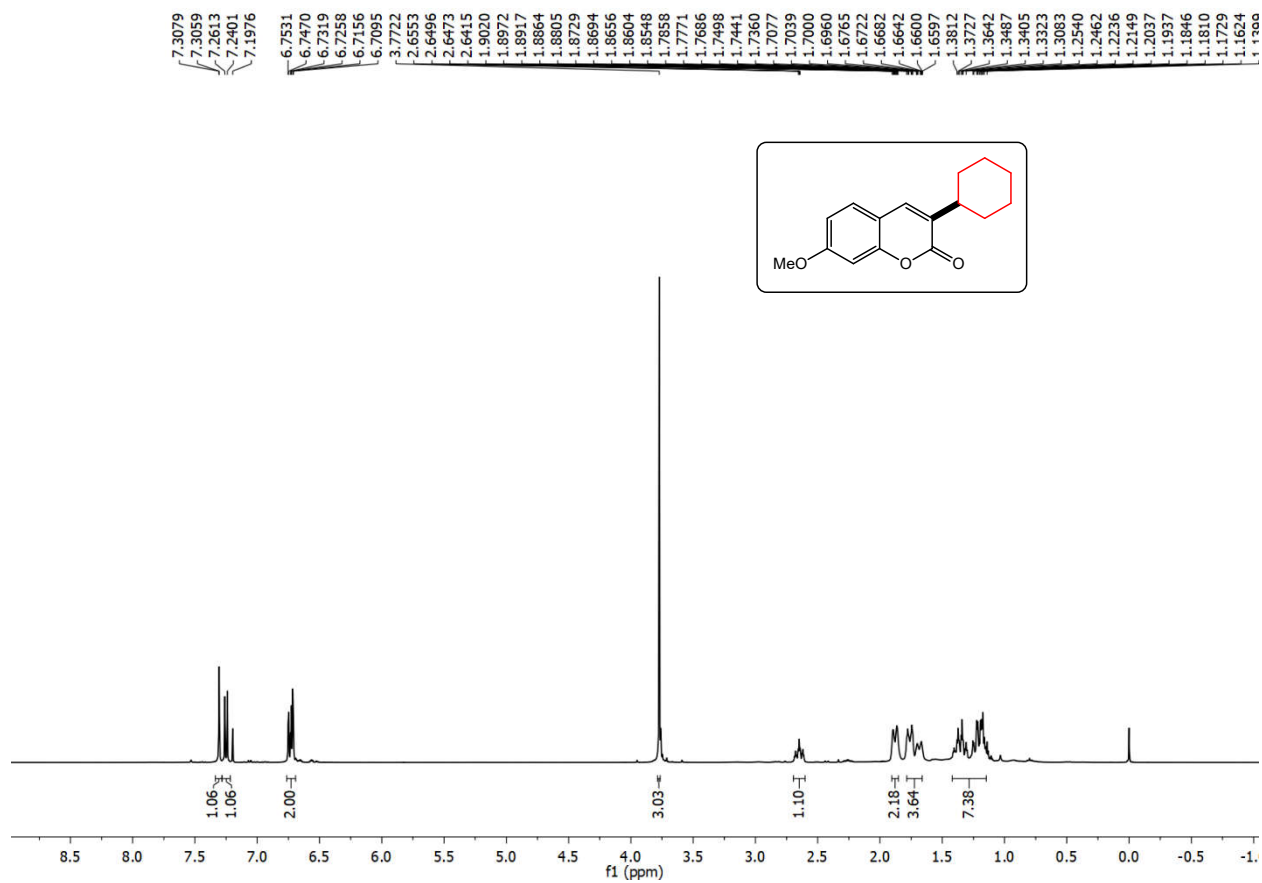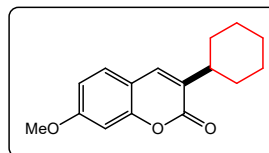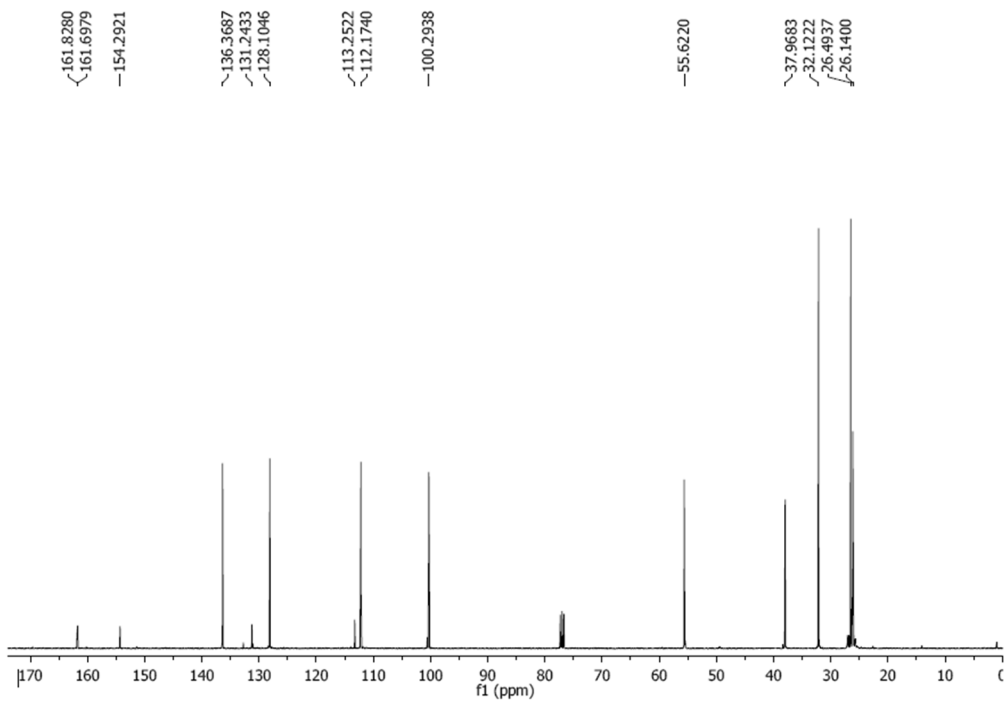

Compound **3u**

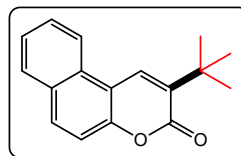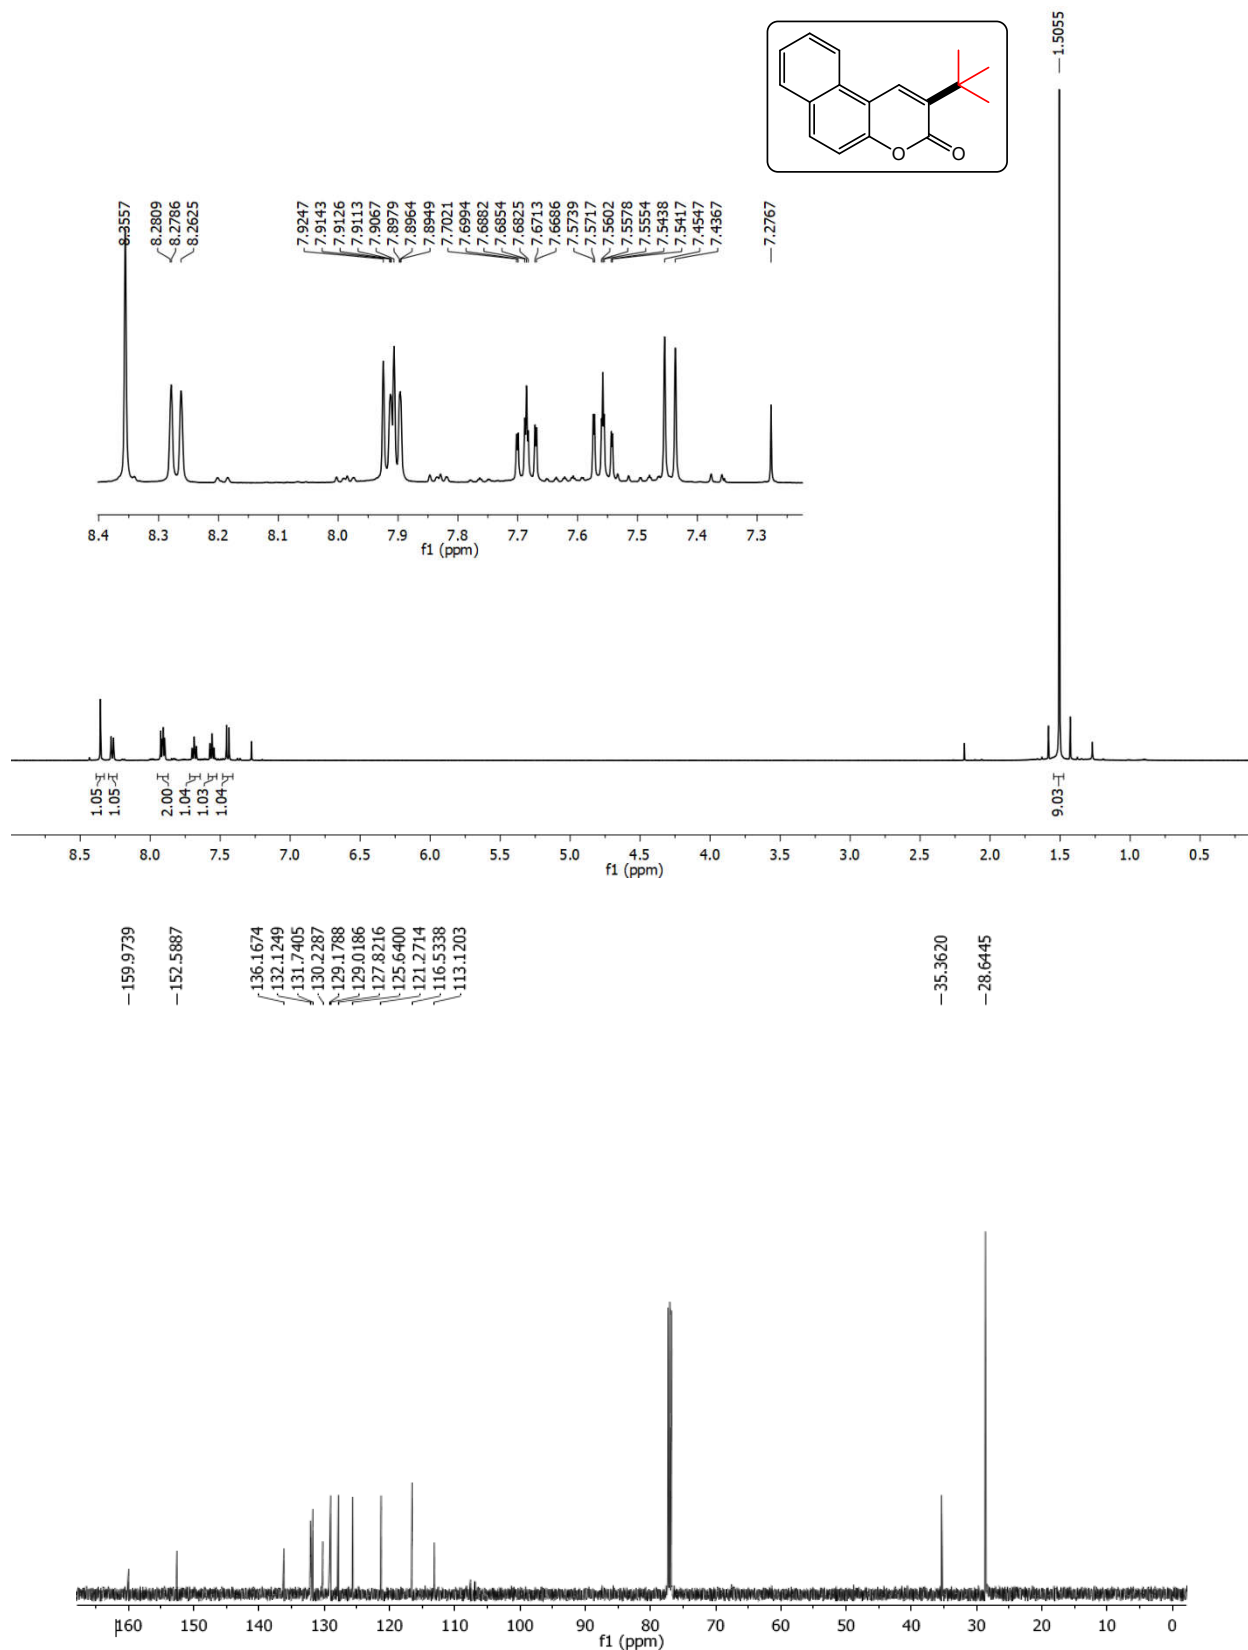

# Compound 3v

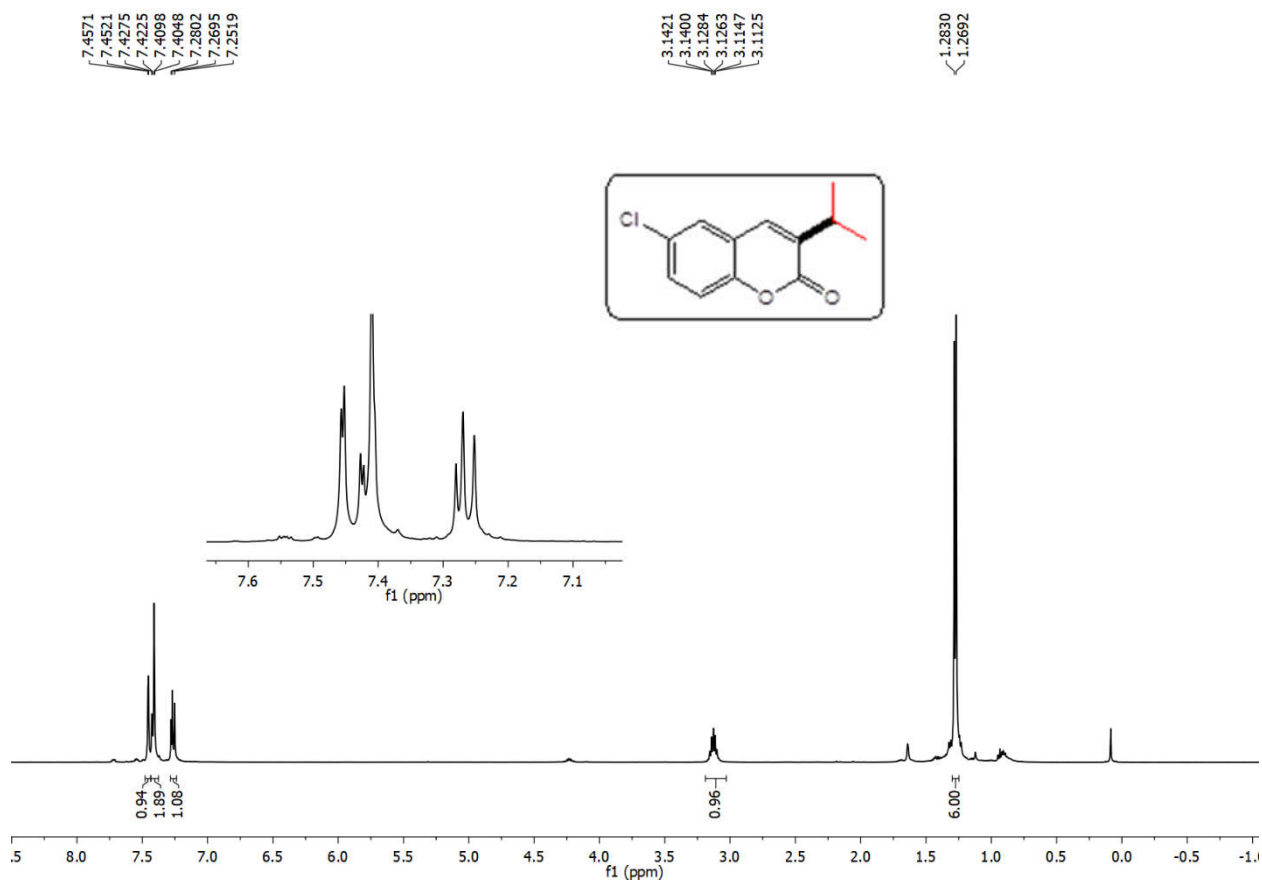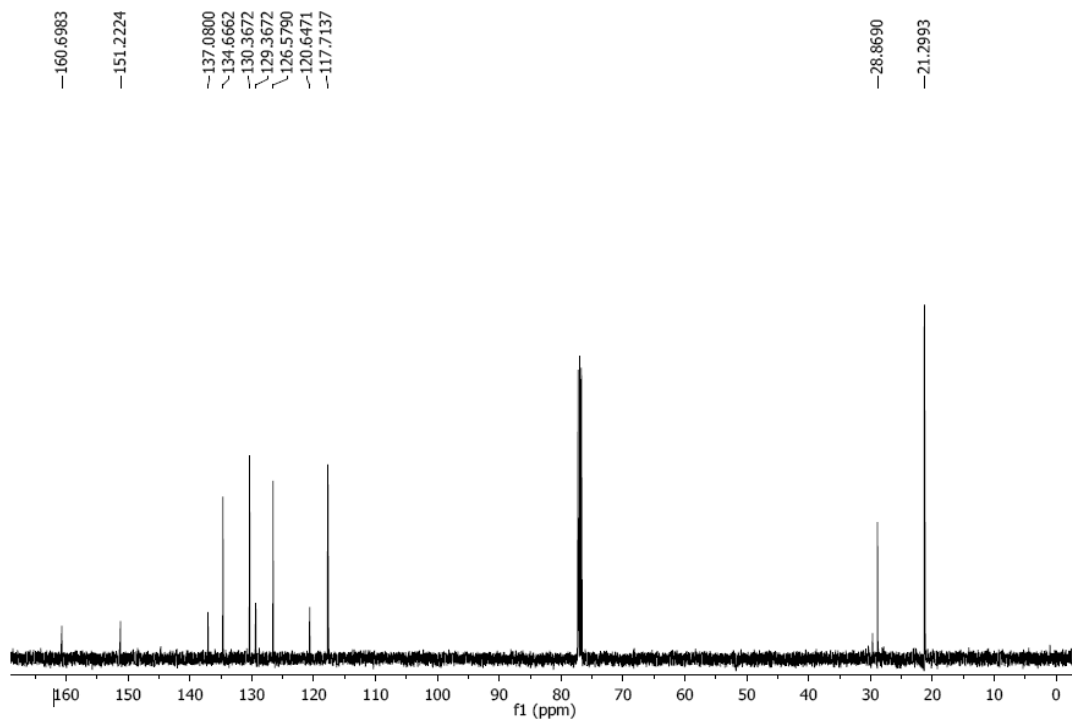

# Compound 4a

7.8336  
7.7403  
7.7374  
7.7350  
7.7236  
7.7210  
7.7185  
7.5731  
7.5578  
7.5512  
7.5485  
7.5368  
7.5341  
7.5314  
7.4922  
7.4892  
7.4865  
7.4835  
7.4748  
7.4722  
7.4696  
7.4631  
7.4602  
7.4580  
7.4476  
7.4447  
7.4420  
7.4392  
7.4350  
7.4301  
7.4281  
7.3945  
7.3781  
7.3363  
7.3340  
7.3315  
7.3212  
7.3190  
7.3166  
7.3062  
7.3039  
7.2835

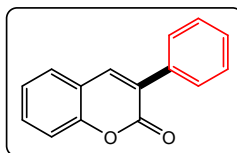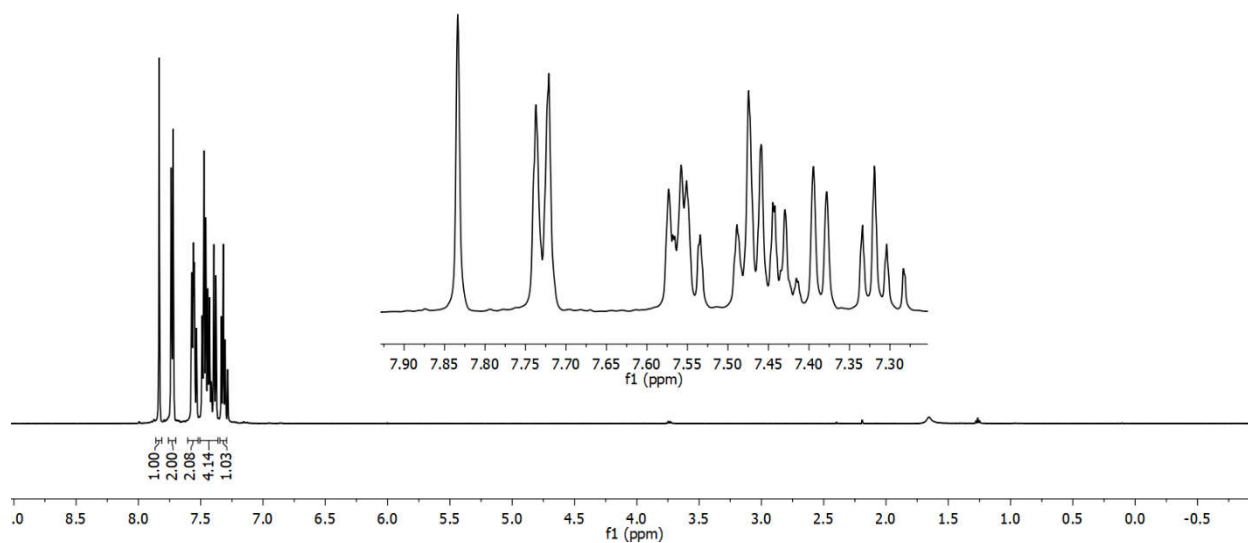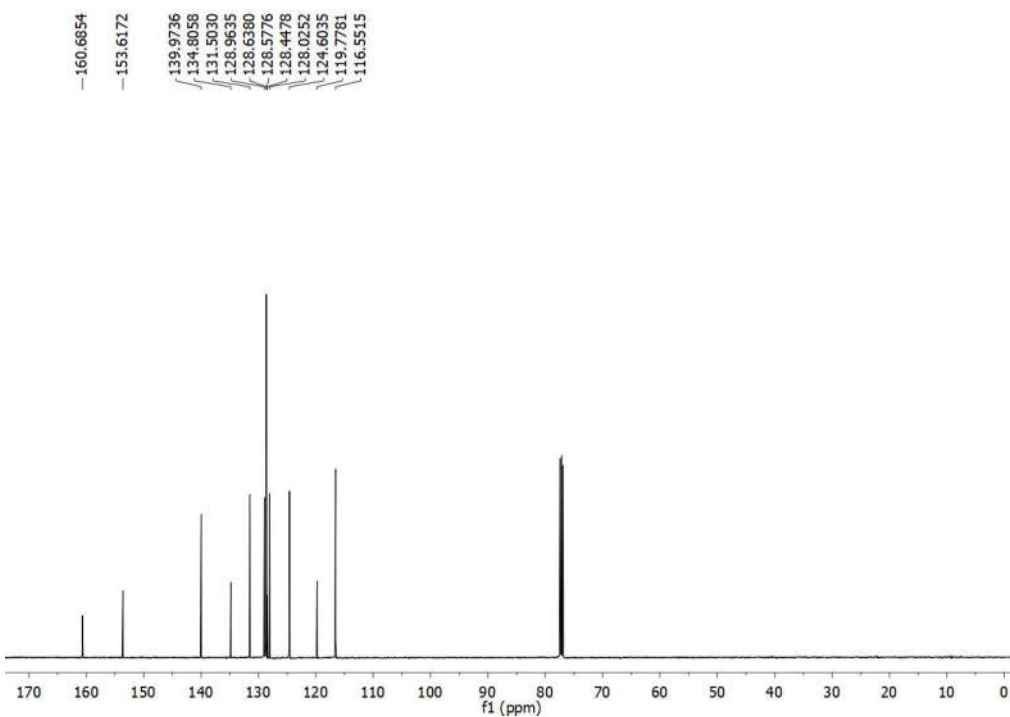

# Compound 4b

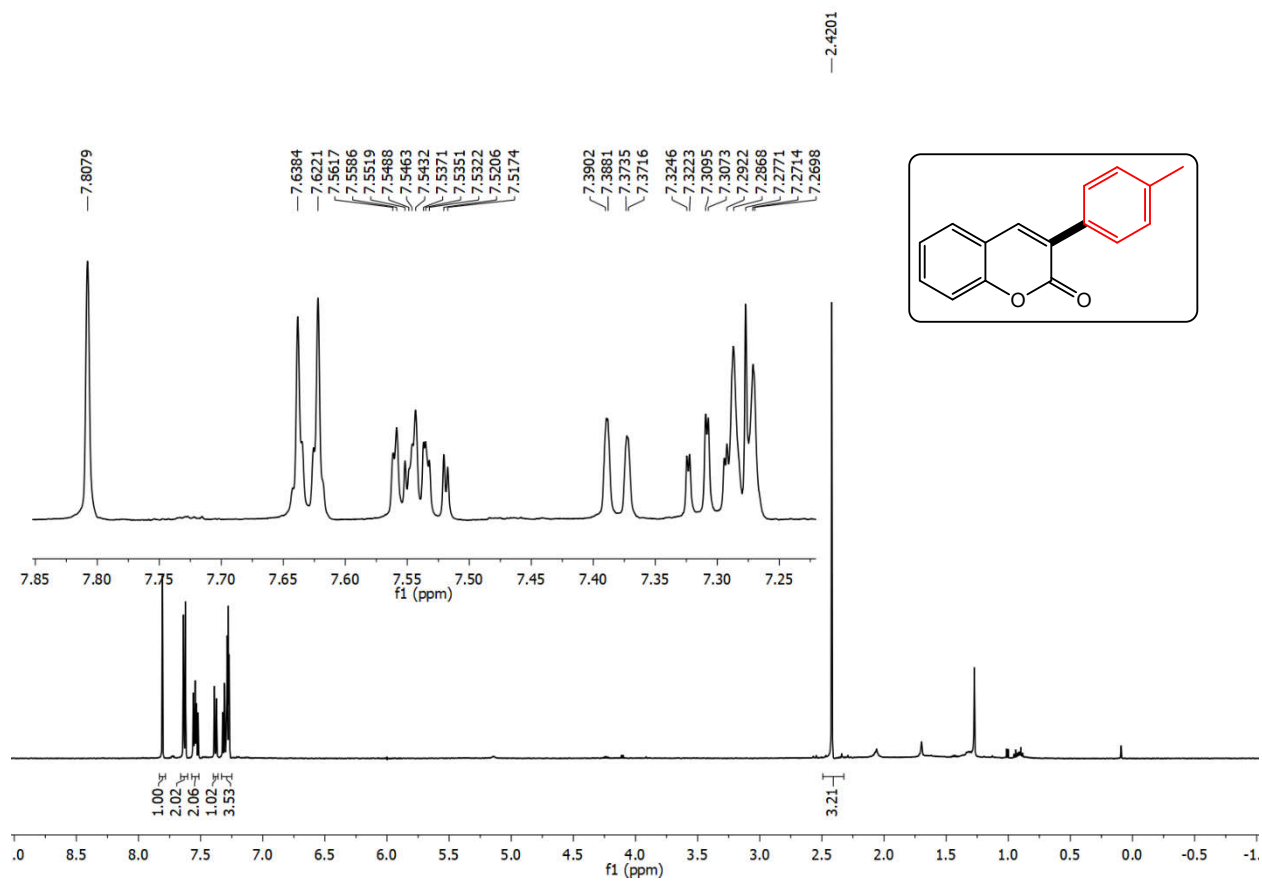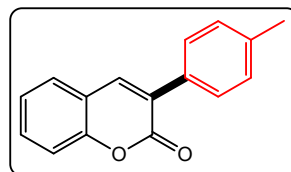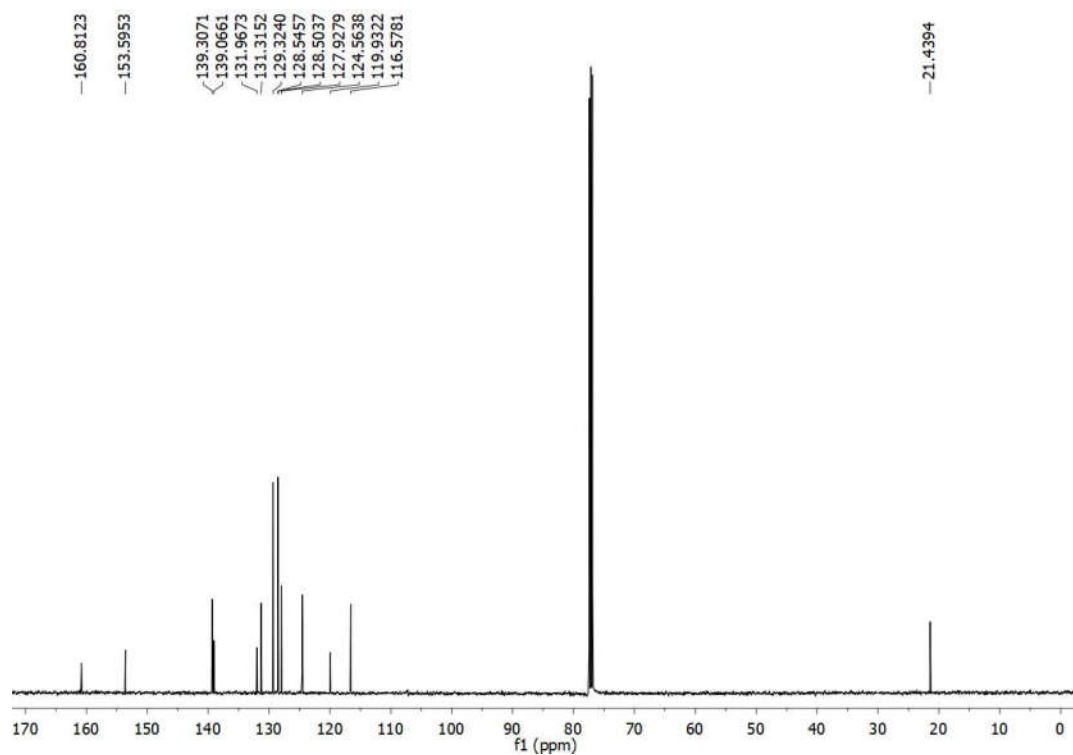

Supplement: c8nj06410e1.pdf [file c8nj06410e1.pdf]
